# Supplementary material for: TRex, a fast multi-animal tracking system with markerless identification, and 2D estimation of posture and visual fields
Source: eLife. 2021 Feb 26;10:e64000. doi: 10.7554/eLife.64000 (PMC8096434; doi:10.7554/eLife.64000)
Supplement: Appendix 4—figure 2—source data 1. — In the table, they are indexed by their length, the software they were produced by, the video they originate from, as well as they bin they belong to. [file elife-64000-app4-fig2-data1.csv]

	segment length (s)	% of data inside bin	software
0	80	55.639106391933936	TRex
1	160	13.097223660602381	TRex
2	320	11.241105584187922	TRex
3	640	13.80179149374879	TRex
4	1515	4.230855710794454	TRex
5	80	72.71436253025534	idtracker.ai
6	160	12.129792377792468	idtracker.ai
7	320	8.238089699257158	idtracker.ai
8	640	2.087357022689838	idtracker.ai
