# Supplementary material for: TRex, a fast multi-animal tracking system with markerless identification, and 2D estimation of posture and visual fields
Source: eLife. 2021 Feb 26;10:e64000. doi: 10.7554/eLife.64000 (PMC8096434; doi:10.7554/eLife.64000)
Supplement: Appendix 4—figure 2—source data 2. [file elife-64000-app4-fig2-data2.csv]

	segment length (s)	bin	software	source
0	8.5	1	TRex	group_1
1	2.5625	1	TRex	group_1
2	66.0625	1	TRex	group_1
3	4.8125	1	TRex	group_1
4	10.4375	1	TRex	group_1
5	5.09375	1	TRex	group_1
6	0.03125	1	TRex	group_1
7	0.03125	1	TRex	group_1
8	0.03125	1	TRex	group_1
9	0.03125	1	TRex	group_1
10	0.03125	1	TRex	group_1
11	22.875	1	TRex	group_1
12	6.84375	1	TRex	group_1
13	12.25	1	TRex	group_1
14	2.34375	1	TRex	group_1
15	2.34375	1	TRex	group_1
16	29.15625	1	TRex	group_1
17	0.0625	1	TRex	group_1
18	2.15625	1	TRex	group_1
19	0.03125	1	TRex	group_1
20	5.59375	1	TRex	group_1
21	0.03125	1	TRex	group_1
22	0.03125	1	TRex	group_1
23	0.03125	1	TRex	group_1
24	26.21875	1	TRex	group_1
25	0.78125	1	TRex	group_1
26	7.4375	1	TRex	group_1
27	0.40625	1	TRex	group_1
28	0.0625	1	TRex	group_1
29	0.03125	1	TRex	group_1
30	17.5	1	TRex	group_1
31	5.09375	1	TRex	group_1
32	20.125	1	TRex	group_1
33	0.03125	1	TRex	group_1
34	18.28125	1	TRex	group_1
35	14.0625	1	TRex	group_1
36	2.1875	1	TRex	group_1
37	11.21875	1	TRex	group_1
38	38.5625	1	TRex	group_1
39	44.625	1	TRex	group_1
40	19.21875	1	TRex	group_1
41	93.0625	2	TRex	group_1
42	0.03125	1	TRex	group_1
43	0.09375	1	TRex	group_1
44	0.03125	1	TRex	group_1
45	0.03125	1	TRex	group_1
46	17.875	1	TRex	group_1
47	0.03125	1	TRex	group_1
48	7.375	1	TRex	group_1
49	10.71875	1	TRex	group_1
50	0.03125	1	TRex	group_1
51	0.0625	1	TRex	group_1
52	0.03125	1	TRex	group_1
53	0.0625	1	TRex	group_1
54	0.03125	1	TRex	group_1
55	0.03125	1	TRex	group_1
56	0.03125	1	TRex	group_1
57	0.03125	1	TRex	group_1
58	64.71875	1	TRex	group_1
59	1.34375	1	TRex	group_1
60	25.5625	1	TRex	group_1
61	15.0	1	TRex	group_1
62	1.28125	1	TRex	group_1
63	10.5	1	TRex	group_1
64	12.625	1	TRex	group_1
65	18.53125	1	TRex	group_1
66	0.4375	1	TRex	group_1
67	2.625	1	TRex	group_1
68	5.34375	1	TRex	group_1
69	2.09375	1	TRex	group_1
70	16.75	1	TRex	group_1
71	5.25	1	TRex	group_1
72	1.28125	1	TRex	group_1
73	20.15625	1	TRex	group_1
74	6.25	1	TRex	group_1
75	5.03125	1	TRex	group_1
76	9.71875	1	TRex	group_1
77	0.8125	1	TRex	group_1
78	0.0625	1	TRex	group_1
79	0.03125	1	TRex	group_1
80	11.0625	1	TRex	group_1
81	3.53125	1	TRex	group_1
82	39.84375	1	TRex	group_1
83	5.8125	1	TRex	group_1
84	24.0	1	TRex	group_1
85	5.71875	1	TRex	group_1
86	7.4375	1	TRex	group_1
87	5.0	1	TRex	group_1
88	11.0	1	TRex	group_1
89	1.3125	1	TRex	group_1
90	0.03125	1	TRex	group_1
91	0.03125	1	TRex	group_1
92	4.1875	1	TRex	group_1
93	5.375	1	TRex	group_1
94	2.09375	1	TRex	group_1
95	1.0625	1	TRex	group_1
96	2.9375	1	TRex	group_1
97	18.8125	1	TRex	group_1
98	2.59375	1	TRex	group_1
99	0.40625	1	TRex	group_1
100	0.875	1	TRex	group_1
101	7.9375	1	TRex	group_1
102	39.9375	1	TRex	group_1
103	14.59375	1	TRex	group_1
104	55.6875	1	TRex	group_1
105	0.6875	1	TRex	group_1
106	0.1875	1	TRex	group_1
107	0.03125	1	TRex	group_1
108	0.03125	1	TRex	group_1
109	0.96875	1	TRex	group_1
110	1.78125	1	TRex	group_1
111	17.875	1	TRex	group_1
112	0.03125	1	TRex	group_1
113	0.125	1	TRex	group_1
114	0.03125	1	TRex	group_1
115	13.1875	1	TRex	group_1
116	5.5	1	TRex	group_1
117	5.03125	1	TRex	group_1
118	59.75	1	TRex	group_1
119	0.03125	1	TRex	group_1
120	12.1875	1	TRex	group_1
121	0.03125	1	TRex	group_1
122	43.0	1	TRex	group_1
123	4.21875	1	TRex	group_1
124	1.09375	1	TRex	group_1
125	5.03125	1	TRex	group_1
126	19.5	1	TRex	group_1
127	27.75	1	TRex	group_1
128	0.03125	1	TRex	group_1
129	0.15625	1	TRex	group_1
130	50.90625	1	TRex	group_1
131	6.375	1	TRex	group_1
132	104.53125	2	TRex	group_1
133	0.0625	1	TRex	group_1
134	21.40625	1	TRex	group_1
135	0.03125	1	TRex	group_1
136	5.875	1	TRex	group_1
137	0.03125	1	TRex	group_1
138	50.375	1	TRex	group_1
139	6.875	1	TRex	group_1
140	5.5625	1	TRex	group_1
141	0.03125	1	TRex	group_1
142	0.03125	1	TRex	group_1
143	0.03125	1	TRex	group_1
144	0.03125	1	TRex	group_1
145	0.03125	1	TRex	group_1
146	0.03125	1	TRex	group_1
147	35.375	1	TRex	group_1
148	32.25	1	TRex	group_1
149	0.03125	1	TRex	group_1
150	0.15625	1	TRex	group_1
151	0.03125	1	TRex	group_1
152	0.03125	1	TRex	group_1
153	230.09375	3	TRex	group_1
154	5.03125	1	TRex	group_1
155	1.25	1	TRex	group_1
156	12.96875	1	TRex	group_1
157	2.71875	1	TRex	group_1
158	1.0	1	TRex	group_1
159	0.40625	1	TRex	group_1
160	0.0625	1	TRex	group_1
161	0.9375	1	TRex	group_1
162	12.75	1	TRex	group_1
163	0.03125	1	TRex	group_1
164	0.15625	1	TRex	group_1
165	1.46875	1	TRex	group_1
166	0.90625	1	TRex	group_1
167	1.21875	1	TRex	group_1
168	12.875	1	TRex	group_1
169	19.96875	1	TRex	group_1
170	0.28125	1	TRex	group_1
171	7.96875	1	TRex	group_1
172	4.375	1	TRex	group_1
173	4.53125	1	TRex	group_1
174	2.9375	1	TRex	group_1
175	0.21875	1	TRex	group_1
176	9.15625	1	TRex	group_1
177	2.21875	1	TRex	group_1
178	2.0625	1	TRex	group_1
179	8.6875	1	TRex	group_1
180	0.03125	1	TRex	group_1
181	0.15625	1	TRex	group_1
182	0.25	1	TRex	group_1
183	0.34375	1	TRex	group_1
184	0.125	1	TRex	group_1
185	1.625	1	TRex	group_1
186	3.5	1	TRex	group_1
187	3.65625	1	TRex	group_1
188	4.84375	1	TRex	group_1
189	0.3125	1	TRex	group_1
190	0.4375	1	TRex	group_1
191	12.78125	1	TRex	group_1
192	5.0	1	TRex	group_1
193	0.03125	1	TRex	group_1
194	0.03125	1	TRex	group_1
195	0.03125	1	TRex	group_1
196	20.59375	1	TRex	group_1
197	8.59375	1	TRex	group_1
198	10.28125	1	TRex	group_1
199	0.03125	1	TRex	group_1
200	0.40625	1	TRex	group_1
201	2.21875	1	TRex	group_1
202	0.09375	1	TRex	group_1
203	0.5	1	TRex	group_1
204	3.28125	1	TRex	group_1
205	23.625	1	TRex	group_1
206	1.59375	1	TRex	group_1
207	5.8125	1	TRex	group_1
208	13.125	1	TRex	group_1
209	16.875	1	TRex	group_1
210	35.90625	1	TRex	group_1
211	5.90625	1	TRex	group_1
212	54.625	1	TRex	group_1
213	21.46875	1	TRex	group_1
214	34.90625	1	TRex	group_1
215	0.03125	1	TRex	group_1
216	0.21875	1	TRex	group_1
217	2.0625	1	TRex	group_1
218	0.03125	1	TRex	group_1
219	1.46875	1	TRex	group_1
220	0.03125	1	TRex	group_1
221	29.625	1	TRex	group_1
222	9.4375	1	TRex	group_1
223	13.4375	1	TRex	group_1
224	26.96875	1	TRex	group_1
225	10.84375	1	TRex	group_1
226	0.03125	1	TRex	group_1
227	0.03125	1	TRex	group_1
228	2.65625	1	TRex	group_1
229	28.78125	1	TRex	group_1
230	2.4375	1	TRex	group_1
231	59.4375	1	TRex	group_1
232	0.03125	1	TRex	group_1
233	10.40625	1	TRex	group_1
234	26.90625	1	TRex	group_1
235	42.875	1	TRex	group_1
236	1.4375	1	TRex	group_1
237	1.21875	1	TRex	group_1
238	13.28125	1	TRex	group_1
239	32.875	1	TRex	group_1
240	7.0	1	TRex	group_1
241	15.875	1	TRex	group_1
242	0.03125	1	TRex	group_1
243	10.71875	1	TRex	group_1
244	8.4375	1	TRex	group_1
245	0.09375	1	TRex	group_1
246	110.21875	2	TRex	group_1
247	0.5625	1	TRex	group_1
248	98.40625	2	TRex	group_1
249	9.3125	1	TRex	group_1
250	0.03125	1	TRex	group_1
251	89.65625	2	TRex	group_1
252	98.625	2	TRex	group_1
253	35.46875	1	TRex	group_1
254	6.6875	1	TRex	group_1
255	3.5625	1	TRex	group_1
256	9.21875	1	TRex	group_1
257	19.375	1	TRex	group_1
258	28.03125	1	TRex	group_1
259	0.03125	1	TRex	group_1
260	0.03125	1	TRex	group_1
261	5.4375	1	TRex	group_1
262	29.4375	1	TRex	group_1
263	9.84375	1	TRex	group_1
264	12.875	1	TRex	group_1
265	6.9375	1	TRex	group_1
266	9.9375	1	TRex	group_1
267	3.0625	1	TRex	group_1
268	0.09375	1	TRex	group_1
269	7.59375	1	TRex	group_1
270	0.65625	1	TRex	group_1
271	0.15625	1	TRex	group_1
272	2.1875	1	TRex	group_1
273	4.5625	1	TRex	group_1
274	0.625	1	TRex	group_1
275	21.1875	1	TRex	group_1
276	0.03125	1	TRex	group_1
277	0.03125	1	TRex	group_1
278	0.03125	1	TRex	group_1
279	0.03125	1	TRex	group_1
280	26.15625	1	TRex	group_1
281	27.84375	1	TRex	group_1
282	0.0625	1	TRex	group_1
283	8.34375	1	TRex	group_1
284	16.0625	1	TRex	group_1
285	0.03125	1	TRex	group_1
286	22.40625	1	TRex	group_1
287	0.03125	1	TRex	group_1
288	2.5	1	TRex	group_1
289	3.125	1	TRex	group_1
290	0.03125	1	TRex	group_1
291	0.03125	1	TRex	group_1
292	2.28125	1	TRex	group_1
293	0.0625	1	TRex	group_1
294	0.03125	1	TRex	group_1
295	0.03125	1	TRex	group_1
296	0.84375	1	TRex	group_1
297	17.15625	1	TRex	group_1
298	0.15625	1	TRex	group_1
299	0.0625	1	TRex	group_1
300	14.65625	1	TRex	group_1
301	1.03125	1	TRex	group_1
302	62.90625	1	TRex	group_1
303	0.03125	1	TRex	group_1
304	38.625	1	TRex	group_1
305	20.59375	1	TRex	group_1
306	22.84375	1	TRex	group_1
307	10.28125	1	TRex	group_1
308	31.21875	1	TRex	group_1
309	0.03125	1	TRex	group_1
310	23.5625	1	TRex	group_1
311	25.0	1	TRex	group_1
312	0.03125	1	TRex	group_1
313	0.03125	1	TRex	group_1
314	0.21875	1	TRex	group_1
315	0.03125	1	TRex	group_1
316	23.125	1	TRex	group_1
317	13.96875	1	TRex	group_1
318	4.65625	1	TRex	group_1
319	22.125	1	TRex	group_1
320	2.625	1	TRex	group_1
321	13.75	1	TRex	group_1
322	0.21875	1	TRex	group_1
323	3.0	1	TRex	group_1
324	27.96875	1	TRex	group_1
325	0.09375	1	TRex	group_1
326	0.09375	1	TRex	group_1
327	38.9375	1	TRex	group_1
328	3.46875	1	TRex	group_1
329	0.0625	1	TRex	group_1
330	26.84375	1	TRex	group_1
331	19.84375	1	TRex	group_1
332	0.15625	1	TRex	group_1
333	0.03125	1	TRex	group_1
334	0.03125	1	TRex	group_1
335	1.5	1	TRex	group_1
336	0.0625	1	TRex	group_1
337	0.03125	1	TRex	group_1
338	0.6875	1	TRex	group_1
339	6.84375	1	TRex	group_1
340	15.21875	1	TRex	group_1
341	6.84375	1	TRex	group_1
342	50.65625	1	TRex	group_1
343	0.03125	1	TRex	group_1
344	2.9375	1	TRex	group_1
345	15.5625	1	TRex	group_1
346	0.90625	1	TRex	group_1
347	3.96875	1	TRex	group_1
348	15.1875	1	TRex	group_1
349	0.46875	1	TRex	group_1
350	0.09375	1	TRex	group_1
351	8.375	1	TRex	group_1
352	73.4375	1	TRex	group_1
353	3.125	1	TRex	group_1
354	19.75	1	TRex	group_1
355	0.03125	1	TRex	group_1
356	14.96875	1	TRex	group_1
357	8.8125	1	TRex	group_1
358	4.125	1	TRex	group_1
359	0.03125	1	TRex	group_1
360	0.6875	1	TRex	group_1
361	51.15625	1	TRex	group_1
362	14.4375	1	TRex	group_1
363	11.46875	1	TRex	group_1
364	11.46875	1	TRex	group_1
365	35.3125	1	TRex	group_1
366	0.5625	1	TRex	group_1
367	0.03125	1	TRex	group_1
368	0.03125	1	TRex	group_1
369	0.03125	1	TRex	group_1
370	0.03125	1	TRex	group_1
371	49.4375	1	TRex	group_1
372	0.03125	1	TRex	group_1
373	15.21875	1	TRex	group_1
374	1.25	1	TRex	group_1
375	29.0	1	TRex	group_1
376	36.78125	1	TRex	group_1
377	0.125	1	TRex	group_1
378	10.96875	1	TRex	group_1
379	26.8125	1	TRex	group_1
380	9.75	1	TRex	group_1
381	6.21875	1	TRex	group_1
382	0.03125	1	TRex	group_1
383	9.03125	1	TRex	group_1
384	0.03125	1	TRex	group_1
385	0.03125	1	TRex	group_1
386	1.625	1	TRex	group_1
387	0.28125	1	TRex	group_1
388	0.0625	1	TRex	group_1
389	9.6875	1	TRex	group_1
390	2.78125	1	TRex	group_1
391	0.03125	1	TRex	group_1
392	0.03125	1	TRex	group_1
393	8.0	1	TRex	group_1
394	20.5	1	TRex	group_1
395	29.1875	1	TRex	group_1
396	14.71875	1	TRex	group_1
397	0.09375	1	TRex	group_1
398	3.78125	1	TRex	group_1
399	0.125	1	TRex	group_1
400	55.0	1	TRex	group_1
401	18.5625	1	TRex	group_1
402	94.40625	2	TRex	group_1
403	143.28125	2	TRex	group_1
404	0.03125	1	TRex	group_1
405	34.78125	1	TRex	group_1
406	0.03125	1	TRex	group_1
407	35.4375	1	TRex	group_1
408	8.46875	1	TRex	group_1
409	0.78125	1	TRex	group_1
410	8.59375	1	TRex	group_1
411	0.03125	1	TRex	group_1
412	0.59375	1	TRex	group_1
413	30.09375	1	TRex	group_1
414	4.9375	1	TRex	group_1
415	11.96875	1	TRex	group_1
416	12.40625	1	TRex	group_1
417	13.375	1	TRex	group_1
418	0.0625	1	TRex	group_1
419	6.59375	1	TRex	group_1
420	0.03125	1	TRex	group_1
421	0.03125	1	TRex	group_1
422	0.03125	1	TRex	group_1
423	0.03125	1	TRex	group_1
424	6.5	1	TRex	group_1
425	0.15625	1	TRex	group_1
426	3.46875	1	TRex	group_1
427	5.9375	1	TRex	group_1
428	5.5	1	TRex	group_1
429	0.03125	1	TRex	group_1
430	3.0625	1	TRex	group_1
431	0.75	1	TRex	group_1
432	14.21875	1	TRex	group_1
433	0.03125	1	TRex	group_1
434	0.0625	1	TRex	group_1
435	11.0	1	TRex	group_1
436	0.71875	1	TRex	group_1
437	0.0625	1	TRex	group_1
438	0.03125	1	TRex	group_1
439	1.90625	1	TRex	group_1
440	15.71875	1	TRex	group_1
441	40.625	1	TRex	group_1
442	27.8125	1	TRex	group_1
443	8.53125	1	TRex	group_1
444	13.21875	1	TRex	group_1
445	18.28125	1	TRex	group_1
446	0.0625	1	TRex	group_1
447	0.03125	1	TRex	group_1
448	13.25	1	TRex	group_1
449	1.28125	1	TRex	group_1
450	0.03125	1	TRex	group_1
451	0.03125	1	TRex	group_1
452	0.03125	1	TRex	group_1
453	7.40625	1	TRex	group_1
454	0.03125	1	TRex	group_1
455	0.03125	1	TRex	group_1
456	0.03125	1	TRex	group_1
457	0.03125	1	TRex	group_1
458	12.65625	1	TRex	group_1
459	0.15625	1	TRex	group_1
460	0.03125	1	TRex	group_1
461	0.03125	1	TRex	group_1
462	0.03125	1	TRex	group_1
463	21.78125	1	TRex	group_1
464	0.21875	1	TRex	group_1
465	25.09375	1	TRex	group_1
466	24.0625	1	TRex	group_1
467	1.46875	1	TRex	group_1
468	50.21875	1	TRex	group_1
469	0.03125	1	TRex	group_1
470	0.03125	1	TRex	group_1
471	30.15625	1	TRex	group_1
472	33.3125	1	TRex	group_1
473	102.59375	2	TRex	group_1
474	9.78125	1	TRex	group_1
475	37.5	1	TRex	group_1
476	0.0625	1	TRex	group_1
477	0.1875	1	TRex	group_1
478	0.03125	1	TRex	group_1
479	0.03125	1	TRex	group_1
480	32.625	1	TRex	group_1
481	5.125	1	TRex	group_1
482	0.125	1	TRex	group_1
483	0.15625	1	TRex	group_1
484	1.8125	1	TRex	group_1
485	9.75	1	TRex	group_1
486	0.09375	1	TRex	group_1
487	0.03125	1	TRex	group_1
488	0.03125	1	TRex	group_1
489	0.03125	1	TRex	group_1
490	0.03125	1	TRex	group_1
491	0.03125	1	TRex	group_1
492	16.71875	1	TRex	group_1
493	0.0625	1	TRex	group_1
494	6.03125	1	TRex	group_1
495	10.4375	1	TRex	group_1
496	0.96875	1	TRex	group_1
497	7.3125	1	TRex	group_1
498	13.25	1	TRex	group_1
499	2.46875	1	TRex	group_1
500	44.4375	1	TRex	group_1
501	36.46875	1	TRex	group_1
502	10.84375	1	TRex	group_1
503	0.03125	1	TRex	group_1
504	12.65625	1	TRex	group_1
505	0.125	1	TRex	group_1
506	0.03125	1	TRex	group_1
507	0.03125	1	TRex	group_1
508	0.03125	1	TRex	group_1
509	5.21875	1	TRex	group_1
510	5.8125	1	TRex	group_1
511	20.1875	1	TRex	group_1
512	0.09375	1	TRex	group_1
513	33.75	1	TRex	group_1
514	43.75	1	TRex	group_1
515	67.21875	1	TRex	group_1
516	11.15625	1	TRex	group_1
517	0.03125	1	TRex	group_1
518	32.875	1	TRex	group_1
519	0.03125	1	TRex	group_1
520	0.0625	1	TRex	group_1
521	0.03125	1	TRex	group_1
522	74.6875	1	TRex	group_1
523	0.03125	1	TRex	group_1
524	0.03125	1	TRex	group_1
525	46.9375	1	TRex	group_1
526	1.1875	1	TRex	group_1
527	0.71875	1	TRex	group_1
528	0.15625	1	TRex	group_1
529	2.09375	1	TRex	group_1
530	3.90625	1	TRex	group_1
531	1.9375	1	TRex	group_1
532	0.34375	1	TRex	group_1
533	9.625	1	TRex	group_1
534	0.03125	1	TRex	group_1
535	17.125	1	TRex	group_1
536	0.03125	1	TRex	group_1
537	0.03125	1	TRex	group_1
538	0.03125	1	TRex	group_1
539	5.6875	1	TRex	group_1
540	0.0625	1	TRex	group_1
541	0.0625	1	TRex	group_1
542	2.28125	1	TRex	group_1
543	3.125	1	TRex	group_1
544	8.15625	1	TRex	group_1
545	5.9375	1	TRex	group_1
546	16.875	1	TRex	group_1
547	12.46875	1	TRex	group_1
548	0.15625	1	TRex	group_1
549	6.0	1	TRex	group_1
550	10.5625	1	TRex	group_1
551	0.03125	1	TRex	group_1
552	2.21875	1	TRex	group_1
553	0.03125	1	TRex	group_1
554	0.0625	1	TRex	group_1
555	0.15625	1	TRex	group_1
556	0.03125	1	TRex	group_1
557	2.40625	1	TRex	group_1
558	8.21875	1	TRex	group_1
559	6.21875	1	TRex	group_1
560	0.0625	1	TRex	group_1
561	16.0625	1	TRex	group_1
562	0.03125	1	TRex	group_1
563	16.15625	1	TRex	group_1
564	13.8125	1	TRex	group_1
565	1.34375	1	TRex	group_1
566	0.03125	1	TRex	group_1
567	9.1875	1	TRex	group_1
568	2.09375	1	TRex	group_1
569	0.46875	1	TRex	group_1
570	0.0625	1	TRex	group_1
571	0.5625	1	TRex	group_1
572	0.03125	1	TRex	group_1
573	1.46875	1	TRex	group_1
574	0.375	1	TRex	group_1
575	5.84375	1	TRex	group_1
576	6.0625	1	TRex	group_1
577	18.53125	1	TRex	group_1
578	17.75	1	TRex	group_1
579	41.75	1	TRex	group_1
580	4.9375	1	TRex	group_1
581	0.15625	1	TRex	group_1
582	13.96875	1	TRex	group_1
583	0.34375	1	TRex	group_1
584	11.34375	1	TRex	group_1
585	0.03125	1	TRex	group_1
586	7.59375	1	TRex	group_1
587	0.46875	1	TRex	group_1
588	14.625	1	TRex	group_1
589	0.125	1	TRex	group_1
590	0.0625	1	TRex	group_1
591	17.28125	1	TRex	group_1
592	0.375	1	TRex	group_1
593	5.34375	1	TRex	group_1
594	7.78125	1	TRex	group_1
595	16.09375	1	TRex	group_1
596	4.5	1	TRex	group_1
597	10.0625	1	TRex	group_1
598	17.4375	1	TRex	group_1
599	14.6875	1	TRex	group_1
600	0.03125	1	TRex	group_1
601	9.5625	1	TRex	group_1
602	2.09375	1	TRex	group_1
603	0.03125	1	TRex	group_1
604	18.28125	1	TRex	group_1
605	0.0625	1	TRex	group_1
606	8.125	1	TRex	group_1
607	7.9375	1	TRex	group_1
608	22.0	1	TRex	group_1
609	0.21875	1	TRex	group_1
610	0.78125	1	TRex	group_1
611	13.125	1	TRex	group_1
612	34.0625	1	TRex	group_1
613	28.3125	1	TRex	group_1
614	10.46875	1	TRex	group_1
615	0.03125	1	TRex	group_1
616	15.28125	1	TRex	group_1
617	4.59375	1	TRex	group_1
618	0.0625	1	TRex	group_1
619	2.4375	1	TRex	group_1
620	0.0625	1	TRex	group_1
621	73.1875	1	TRex	group_1
622	17.875	1	TRex	group_1
623	14.125	1	TRex	group_1
624	0.03125	1	TRex	group_1
625	58.71875	1	TRex	group_1
626	43.4375	1	TRex	group_1
627	0.03125	1	TRex	group_1
628	0.09375	1	TRex	group_1
629	0.03125	1	TRex	group_1
630	1.78125	1	TRex	group_1
631	4.8125	1	TRex	group_1
632	5.09375	1	TRex	group_1
633	8.8125	1	TRex	group_1
634	0.03125	1	TRex	group_1
635	41.46875	1	TRex	group_1
636	51.4375	1	TRex	group_1
637	7.5625	1	TRex	group_1
638	0.15625	1	TRex	group_1
639	17.84375	1	TRex	group_1
640	0.03125	1	TRex	group_1
641	3.09375	1	TRex	group_1
642	5.75	1	TRex	group_1
643	24.40625	1	TRex	group_1
644	0.59375	1	TRex	group_1
645	7.6875	1	TRex	group_1
646	42.75	1	TRex	group_1
647	35.71875	1	TRex	group_1
648	67.53125	1	TRex	group_1
649	43.84375	1	TRex	group_1
650	0.03125	1	TRex	group_1
651	7.6875	1	TRex	group_1
652	0.03125	1	TRex	group_1
653	7.15625	1	TRex	group_1
654	0.65625	1	TRex	group_1
655	1.28125	1	TRex	group_1
656	0.6875	1	TRex	group_1
657	0.03125	1	TRex	group_1
658	1.4375	1	TRex	group_1
659	3.1875	1	TRex	group_1
660	0.03125	1	TRex	group_1
661	0.03125	1	TRex	group_1
662	0.03125	1	TRex	group_1
663	0.0625	1	TRex	group_1
664	3.75	1	TRex	group_1
665	8.1875	1	TRex	group_1
666	0.46875	1	TRex	group_1
667	27.9375	1	TRex	group_1
668	0.53125	1	TRex	group_1
669	23.25	1	TRex	group_1
670	2.0625	1	TRex	group_1
671	23.5625	1	TRex	group_1
672	11.5625	1	TRex	group_1
673	7.0	1	TRex	group_1
674	2.5	1	TRex	group_1
675	0.375	1	TRex	group_1
676	3.21875	1	TRex	group_1
677	7.96875	1	TRex	group_1
678	29.375	1	TRex	group_1
679	28.65625	1	TRex	group_1
680	12.5	1	TRex	group_1
681	0.03125	1	TRex	group_1
682	0.03125	1	TRex	group_1
683	1.03125	1	TRex	group_1
684	11.6875	1	TRex	group_1
685	0.15625	1	TRex	group_1
686	0.03125	1	TRex	group_1
687	0.03125	1	TRex	group_1
688	61.6875	1	TRex	group_1
689	0.5625	1	TRex	group_1
690	20.65625	1	TRex	group_1
691	27.625	1	TRex	group_1
692	1.71875	1	TRex	group_1
693	4.0625	1	TRex	group_1
694	10.0	1	TRex	group_1
695	12.34375	1	TRex	group_1
696	5.25	1	TRex	group_1
697	34.96875	1	TRex	group_1
698	24.28125	1	TRex	group_1
699	4.1875	1	TRex	group_1
700	53.28125	1	TRex	group_1
701	37.25	1	TRex	group_1
702	29.0	1	TRex	group_1
703	57.125	1	TRex	group_1
704	1.28125	1	TRex	group_1
705	0.78125	1	TRex	group_1
706	2.65625	1	TRex	group_1
707	1.6875	1	TRex	group_1
708	2.75	1	TRex	group_1
709	0.40625	1	TRex	group_1
710	4.375	1	TRex	group_1
711	12.03125	1	TRex	group_1
712	2.125	1	TRex	group_1
713	0.03125	1	TRex	group_1
714	0.65625	1	TRex	group_1
715	20.9375	1	TRex	group_1
716	0.03125	1	TRex	group_1
717	2.8125	1	TRex	group_1
718	4.1875	1	TRex	group_1
719	2.0625	1	TRex	group_1
720	1.96875	1	TRex	group_1
721	12.6875	1	TRex	group_1
722	8.1875	1	TRex	group_1
723	0.1875	1	TRex	group_1
724	9.5625	1	TRex	group_1
725	39.25	1	TRex	group_1
726	1.375	1	TRex	group_1
727	14.59375	1	TRex	group_1
728	9.0	1	TRex	group_1
729	6.40625	1	TRex	group_1
730	24.8125	1	TRex	group_1
731	16.78125	1	TRex	group_1
732	7.875	1	TRex	group_1
733	6.0625	1	TRex	group_1
734	0.125	1	TRex	group_1
735	4.40625	1	TRex	group_1
736	5.0625	1	TRex	group_1
737	0.03125	1	TRex	group_1
738	0.03125	1	TRex	group_1
739	3.09375	1	TRex	group_1
740	56.59375	1	TRex	group_1
741	0.28125	1	TRex	group_1
742	0.03125	1	TRex	group_1
743	4.34375	1	TRex	group_1
744	35.3125	1	TRex	group_1
745	0.5	1	TRex	group_1
746	67.0	1	TRex	group_1
747	27.34375	1	TRex	group_1
748	20.25	1	TRex	group_1
749	16.9375	1	TRex	group_1
750	2.96875	1	TRex	group_1
751	41.90625	1	TRex	group_1
752	0.15625	1	TRex	group_1
753	56.1875	1	TRex	group_1
754	0.40625	1	TRex	group_1
755	40.625	1	TRex	group_1
756	7.09375	1	TRex	group_1
757	3.5	1	TRex	group_1
758	19.15625	1	TRex	group_1
759	25.96875	1	TRex	group_1
760	10.21875	1	TRex	group_1
761	9.1875	1	TRex	group_1
762	19.84375	1	TRex	group_1
763	22.0625	1	TRex	group_1
764	2.5625	1	TRex	group_1
765	26.40625	1	TRex	group_1
766	15.46875	1	TRex	group_1
767	10.125	1	TRex	group_1
768	0.53125	1	TRex	group_1
769	13.3125	1	TRex	group_1
770	16.21875	1	TRex	group_1
771	0.03125	1	TRex	group_1
772	2.6875	1	TRex	group_1
773	0.03125	1	TRex	group_1
774	12.40625	1	TRex	group_1
775	18.375	1	TRex	group_1
776	66.3125	1	TRex	group_1
777	19.5625	1	TRex	group_1
778	83.75	2	TRex	group_1
779	7.96875	1	TRex	group_1
780	22.125	1	TRex	group_1
781	49.625	1	TRex	group_1
782	19.5	1	TRex	group_1
783	97.71875	2	TRex	group_1
784	1.09375	1	TRex	group_1
785	2.6875	1	TRex	group_1
786	0.1875	1	TRex	group_1
787	0.03125	1	TRex	group_1
788	0.09375	1	TRex	group_1
789	3.5625	1	TRex	group_1
790	6.59375	1	TRex	group_1
791	0.03125	1	TRex	group_1
792	5.875	1	TRex	group_1
793	0.15625	1	TRex	group_1
794	0.03125	1	TRex	group_1
795	11.8125	1	TRex	group_1
796	2.78125	1	TRex	group_1
797	0.0625	1	TRex	group_1
798	0.59375	1	TRex	group_1
799	1.8125	1	TRex	group_1
800	6.25	1	TRex	group_1
801	11.59375	1	TRex	group_1
802	2.0	1	TRex	group_1
803	16.84375	1	TRex	group_1
804	5.4375	1	TRex	group_1
805	12.90625	1	TRex	group_1
806	0.15625	1	TRex	group_1
807	29.25	1	TRex	group_1
808	36.90625	1	TRex	group_1
809	21.28125	1	TRex	group_1
810	4.65625	1	TRex	group_1
811	31.59375	1	TRex	group_1
812	26.5	1	TRex	group_1
813	4.78125	1	TRex	group_1
814	28.125	1	TRex	group_1
815	10.65625	1	TRex	group_1
816	0.03125	1	TRex	group_1
817	0.53125	1	TRex	group_1
818	37.5	1	TRex	group_1
819	5.75	1	TRex	group_1
820	10.0	1	TRex	group_1
821	7.25	1	TRex	group_1
822	0.125	1	TRex	group_1
823	3.15625	1	TRex	group_1
824	9.4375	1	TRex	group_1
825	25.84375	1	TRex	group_1
826	8.5625	1	TRex	group_1
827	0.0625	1	TRex	group_1
828	3.75	1	TRex	group_1
829	4.875	1	TRex	group_1
830	13.5	1	TRex	group_1
831	31.0625	1	TRex	group_1
832	11.21875	1	TRex	group_1
833	0.21875	1	TRex	group_1
834	0.03125	1	TRex	group_1
835	0.59375	1	TRex	group_1
836	0.09375	1	TRex	group_1
837	0.03125	1	TRex	group_1
838	7.90625	1	TRex	group_1
839	14.46875	1	TRex	group_1
840	14.71875	1	TRex	group_1
841	5.5625	1	TRex	group_1
842	21.0	1	TRex	group_1
843	0.03125	1	TRex	group_1
844	73.4375	1	TRex	group_1
845	0.0625	1	TRex	group_1
846	1.3125	1	TRex	group_1
847	0.78125	1	TRex	group_1
848	1.125	1	TRex	group_1
849	1.09375	1	TRex	group_1
850	6.0	1	TRex	group_1
851	13.125	1	TRex	group_1
852	2.78125	1	TRex	group_1
853	8.8125	1	TRex	group_1
854	1.21875	1	TRex	group_1
855	0.90625	1	TRex	group_1
856	0.03125	1	TRex	group_1
857	6.6875	1	TRex	group_1
858	1.125	1	TRex	group_1
859	1.0	1	TRex	group_1
860	4.28125	1	TRex	group_1
861	0.1875	1	TRex	group_1
862	6.875	1	TRex	group_1
863	0.15625	1	TRex	group_1
864	0.03125	1	TRex	group_1
865	1.84375	1	TRex	group_1
866	23.84375	1	TRex	group_1
867	2.9375	1	TRex	group_1
868	6.34375	1	TRex	group_1
869	4.625	1	TRex	group_1
870	2.84375	1	TRex	group_1
871	19.4375	1	TRex	group_1
872	4.71875	1	TRex	group_1
873	46.90625	1	TRex	group_1
874	0.0625	1	TRex	group_1
875	42.40625	1	TRex	group_1
876	75.625	1	TRex	group_1
877	0.9375	1	TRex	group_1
878	9.53125	1	TRex	group_1
879	29.3125	1	TRex	group_1
880	41.4375	1	TRex	group_1
881	27.1875	1	TRex	group_1
882	1.84375	1	TRex	group_1
883	15.25	1	TRex	group_1
884	17.71875	1	TRex	group_1
885	0.28125	1	TRex	group_1
886	0.5	1	TRex	group_1
887	3.375	1	TRex	group_1
888	18.75	1	TRex	group_1
889	7.3125	1	TRex	group_1
890	0.03125	1	TRex	group_1
891	1.28125	1	TRex	group_1
892	131.78125	2	TRex	group_1
893	0.03125	1	TRex	group_1
894	1.0	1	TRex	group_1
895	6.15625	1	TRex	group_1
896	7.75	1	TRex	group_1
897	0.53125	1	TRex	group_1
898	6.59375	1	TRex	group_1
899	5.90625	1	TRex	group_1
900	10.40625	1	TRex	group_1
901	0.90625	1	TRex	group_1
902	0.0625	1	TRex	group_1
903	3.6875	1	TRex	group_1
904	6.1875	1	TRex	group_1
905	17.46875	1	TRex	group_1
906	3.8125	1	TRex	group_1
907	0.03125	1	TRex	group_1
908	2.03125	1	TRex	group_1
909	18.0625	1	TRex	group_1
910	30.71875	1	TRex	group_1
911	9.5625	1	TRex	group_1
912	4.75	1	TRex	group_1
913	0.21875	1	TRex	group_1
914	0.125	1	TRex	group_1
915	68.21875	1	TRex	group_1
916	6.0	1	TRex	group_1
917	0.53125	1	TRex	group_1
918	10.125	1	TRex	group_1
919	0.03125	1	TRex	group_1
920	6.5625	1	TRex	group_1
921	0.78125	1	TRex	group_1
922	9.53125	1	TRex	group_1
923	0.03125	1	TRex	group_1
924	29.625	1	TRex	group_1
925	40.09375	1	TRex	group_1
926	18.15625	1	TRex	group_1
927	1.28125	1	TRex	group_1
928	0.03125	1	TRex	group_1
929	6.9375	1	TRex	group_1
930	31.3125	1	TRex	group_1
931	8.5625	1	TRex	group_1
932	0.03125	1	TRex	group_1
933	0.03125	1	TRex	group_1
934	15.03125	1	TRex	group_1
935	7.0	1	TRex	group_1
936	70.9375	1	TRex	group_1
937	0.03125	1	TRex	group_1
938	0.03125	1	TRex	group_1
939	0.03125	1	TRex	group_1
940	0.03125	1	TRex	group_1
941	0.34375	1	TRex	group_1
942	0.15625	1	TRex	group_1
943	35.875	1	TRex	group_1
944	5.40625	1	TRex	group_1
945	8.125	1	TRex	group_1
946	4.0	1	TRex	group_1
947	59.4375	1	TRex	group_1
948	25.21875	1	TRex	group_1
949	0.65625	1	TRex	group_1
950	0.625	1	TRex	group_1
951	0.4375	1	TRex	group_1
952	1.34375	1	TRex	group_1
953	1.1875	1	TRex	group_1
954	0.125	1	TRex	group_1
955	0.0625	1	TRex	group_1
956	0.25	1	TRex	group_1
957	0.0625	1	TRex	group_1
958	2.5	1	TRex	group_1
959	2.625	1	TRex	group_1
960	0.15625	1	TRex	group_1
961	14.15625	1	TRex	group_1
962	0.03125	1	TRex	group_1
963	0.1875	1	TRex	group_1
964	0.03125	1	TRex	group_1
965	0.03125	1	TRex	group_1
966	9.875	1	TRex	group_1
967	3.21875	1	TRex	group_1
968	0.1875	1	TRex	group_1
969	0.25	1	TRex	group_1
970	5.09375	1	TRex	group_1
971	6.03125	1	TRex	group_1
972	0.03125	1	TRex	group_1
973	16.59375	1	TRex	group_1
974	18.125	1	TRex	group_1
975	0.03125	1	TRex	group_1
976	6.5	1	TRex	group_1
977	78.71875	1	TRex	group_1
978	2.6875	1	TRex	group_1
979	19.5625	1	TRex	group_1
980	30.0625	1	TRex	group_1
981	18.625	1	TRex	group_1
982	41.84375	1	TRex	group_1
983	0.6875	1	TRex	group_1
984	4.5	1	TRex	group_1
985	13.96875	1	TRex	group_1
986	0.03125	1	TRex	group_1
987	34.90625	1	TRex	group_1
988	8.28125	1	TRex	group_1
989	0.4375	1	TRex	group_1
990	42.4375	1	TRex	group_1
991	0.03125	1	TRex	group_1
992	3.5625	1	TRex	group_1
993	55.46875	1	TRex	group_1
994	15.4375	1	TRex	group_1
995	14.09375	1	TRex	group_1
996	0.0625	1	TRex	group_1
997	125.78125	2	TRex	group_1
998	2.75	1	TRex	group_1
999	1.0625	1	TRex	group_1
1000	0.375	1	TRex	group_1
1001	0.25	1	TRex	group_1
1002	9.25	1	TRex	group_1
1003	0.6875	1	TRex	group_1
1004	6.28125	1	TRex	group_1
1005	8.375	1	TRex	group_1
1006	0.03125	1	TRex	group_1
1007	17.15625	1	TRex	group_1
1008	33.71875	1	TRex	group_1
1009	1.375	1	TRex	group_1
1010	17.21875	1	TRex	group_1
1011	18.34375	1	TRex	group_1
1012	37.9375	1	TRex	group_1
1013	5.59375	1	TRex	group_1
1014	8.90625	1	TRex	group_1
1015	16.875	1	TRex	group_1
1016	34.5	1	TRex	group_1
1017	0.03125	1	TRex	group_1
1018	11.40625	1	TRex	group_1
1019	11.21875	1	TRex	group_1
1020	11.3125	1	TRex	group_1
1021	21.09375	1	TRex	group_1
1022	12.4375	1	TRex	group_1
1023	3.1875	1	TRex	group_1
1024	21.75	1	TRex	group_1
1025	6.78125	1	TRex	group_1
1026	24.625	1	TRex	group_1
1027	0.15625	1	TRex	group_1
1028	14.25	1	TRex	group_1
1029	36.84375	1	TRex	group_1
1030	45.96875	1	TRex	group_1
1031	0.03125	1	TRex	group_1
1032	4.375	1	TRex	group_1
1033	28.375	1	TRex	group_1
1034	0.03125	1	TRex	group_1
1035	0.0625	1	TRex	group_1
1036	23.5625	1	TRex	group_1
1037	0.5	1	TRex	group_1
1038	98.3125	2	TRex	group_1
1039	0.03125	1	TRex	group_1
1040	4.3125	1	TRex	group_1
1041	8.375	1	TRex	group_1
1042	0.25	1	TRex	group_1
1043	1.1875	1	TRex	group_1
1044	3.875	1	TRex	group_1
1045	6.8125	1	TRex	group_1
1046	0.9375	1	TRex	group_1
1047	0.0625	1	TRex	group_1
1048	10.125	1	TRex	group_1
1049	3.3125	1	TRex	group_1
1050	0.03125	1	TRex	group_1
1051	3.6875	1	TRex	group_1
1052	0.03125	1	TRex	group_1
1053	0.03125	1	TRex	group_1
1054	3.875	1	TRex	group_1
1055	0.375	1	TRex	group_1
1056	1.84375	1	TRex	group_1
1057	6.25	1	TRex	group_1
1058	5.21875	1	TRex	group_1
1059	0.15625	1	TRex	group_1
1060	2.15625	1	TRex	group_1
1061	0.03125	1	TRex	group_1
1062	5.0625	1	TRex	group_1
1063	0.03125	1	TRex	group_1
1064	2.46875	1	TRex	group_1
1065	8.09375	1	TRex	group_1
1066	0.03125	1	TRex	group_1
1067	1.78125	1	TRex	group_1
1068	1.3125	1	TRex	group_1
1069	0.78125	1	TRex	group_1
1070	1.25	1	TRex	group_1
1071	0.5	1	TRex	group_1
1072	0.28125	1	TRex	group_1
1073	8.34375	1	TRex	group_1
1074	2.3125	1	TRex	group_1
1075	0.1875	1	TRex	group_1
1076	0.03125	1	TRex	group_1
1077	0.03125	1	TRex	group_1
1078	0.03125	1	TRex	group_1
1079	9.625	1	TRex	group_1
1080	2.34375	1	TRex	group_1
1081	6.1875	1	TRex	group_1
1082	0.3125	1	TRex	group_1
1083	0.03125	1	TRex	group_1
1084	0.03125	1	TRex	group_1
1085	3.28125	1	TRex	group_1
1086	0.15625	1	TRex	group_1
1087	0.03125	1	TRex	group_1
1088	3.125	1	TRex	group_1
1089	5.15625	1	TRex	group_1
1090	0.3125	1	TRex	group_1
1091	0.1875	1	TRex	group_1
1092	0.15625	1	TRex	group_1
1093	0.59375	1	TRex	group_1
1094	5.6875	1	TRex	group_1
1095	0.5	1	TRex	group_1
1096	0.03125	1	TRex	group_1
1097	0.25	1	TRex	group_1
1098	0.03125	1	TRex	group_1
1099	0.03125	1	TRex	group_1
1100	15.3125	1	TRex	group_1
1101	4.90625	1	TRex	group_1
1102	0.59375	1	TRex	group_1
1103	0.375	1	TRex	group_1
1104	5.90625	1	TRex	group_1
1105	3.40625	1	TRex	group_1
1106	0.03125	1	TRex	group_1
1107	3.21875	1	TRex	group_1
1108	0.40625	1	TRex	group_1
1109	0.0625	1	TRex	group_1
1110	11.34375	1	TRex	group_1
1111	0.625	1	TRex	group_1
1112	14.40625	1	TRex	group_1
1113	2.75	1	TRex	group_1
1114	0.03125	1	TRex	group_1
1115	2.53125	1	TRex	group_1
1116	2.5	1	TRex	group_1
1117	13.40625	1	TRex	group_1
1118	0.375	1	TRex	group_1
1119	18.40625	1	TRex	group_1
1120	0.03125	1	TRex	group_1
1121	0.25	1	TRex	group_1
1122	0.03125	1	TRex	group_1
1123	0.28125	1	TRex	group_1
1124	0.53125	1	TRex	group_1
1125	0.1875	1	TRex	group_1
1126	0.03125	1	TRex	group_1
1127	9.78125	1	TRex	group_1
1128	1.40625	1	TRex	group_1
1129	0.03125	1	TRex	group_1
1130	0.03125	1	TRex	group_1
1131	4.9375	1	TRex	group_1
1132	0.40625	1	TRex	group_1
1133	1.96875	1	TRex	group_1
1134	11.5625	1	TRex	group_1
1135	1.34375	1	TRex	group_1
1136	0.5	1	TRex	group_1
1137	0.15625	1	TRex	group_1
1138	19.25	1	TRex	group_1
1139	2.71875	1	TRex	group_1
1140	1.6875	1	TRex	group_1
1141	29.28125	1	TRex	group_1
1142	20.5625	1	TRex	group_1
1143	9.71875	1	TRex	group_1
1144	4.1875	1	TRex	group_1
1145	1.3125	1	TRex	group_1
1146	20.1875	1	TRex	group_1
1147	8.34375	1	TRex	group_1
1148	1.46875	1	TRex	group_1
1149	6.28125	1	TRex	group_1
1150	0.03125	1	TRex	group_1
1151	0.0625	1	TRex	group_1
1152	7.09375	1	TRex	group_1
1153	8.375	1	TRex	group_1
1154	12.65625	1	TRex	group_1
1155	0.125	1	TRex	group_1
1156	3.09375	1	TRex	group_1
1157	2.9375	1	TRex	group_1
1158	8.03125	1	TRex	group_1
1159	24.5	1	TRex	group_1
1160	0.03125	1	TRex	group_1
1161	25.46875	1	TRex	group_1
1162	22.78125	1	TRex	group_1
1163	0.03125	1	TRex	group_1
1164	36.0625	1	TRex	group_1
1165	29.28125	1	TRex	group_1
1166	0.09375	1	TRex	group_1
1167	29.71875	1	TRex	group_1
1168	10.59375	1	TRex	group_1
1169	0.84375	1	TRex	group_1
1170	1.59375	1	TRex	group_1
1171	1.71875	1	TRex	group_1
1172	3.8125	1	TRex	group_1
1173	1.6875	1	TRex	group_1
1174	0.03125	1	TRex	group_1
1175	0.6875	1	TRex	group_1
1176	0.03125	1	TRex	group_1
1177	0.09375	1	TRex	group_1
1178	0.03125	1	TRex	group_1
1179	0.03125	1	TRex	group_1
1180	0.1875	1	TRex	group_1
1181	0.03125	1	TRex	group_1
1182	0.65625	1	TRex	group_1
1183	1.25	1	TRex	group_1
1184	1.28125	1	TRex	group_1
1185	3.28125	1	TRex	group_1
1186	0.25	1	TRex	group_1
1187	0.15625	1	TRex	group_1
1188	0.03125	1	TRex	group_1
1189	0.03125	1	TRex	group_1
1190	0.03125	1	TRex	group_1
1191	0.71875	1	TRex	group_1
1192	0.03125	1	TRex	group_1
1193	0.03125	1	TRex	group_1
1194	3.03125	1	TRex	group_1
1195	0.03125	1	TRex	group_1
1196	3.5625	1	TRex	group_1
1197	0.4375	1	TRex	group_1
1198	0.03125	1	TRex	group_1
1199	0.03125	1	TRex	group_1
1200	0.03125	1	TRex	group_1
1201	0.53125	1	TRex	group_1
1202	1.15625	1	TRex	group_1
1203	2.21875	1	TRex	group_1
1204	0.03125	1	TRex	group_1
1205	0.5625	1	TRex	group_1
1206	0.4375	1	TRex	group_1
1207	0.0625	1	TRex	group_1
1208	0.46875	1	TRex	group_1
1209	2.40625	1	TRex	group_1
1210	1.3125	1	TRex	group_1
1211	0.46875	1	TRex	group_1
1212	0.625	1	TRex	group_1
1213	0.03125	1	TRex	group_1
1214	0.125	1	TRex	group_1
1215	0.03125	1	TRex	group_1
1216	0.25	1	TRex	group_2
1217	0.03125	1	TRex	group_2
1218	0.03125	1	TRex	group_2
1219	0.78125	1	TRex	group_2
1220	0.03125	1	TRex	group_2
1221	0.03125	1	TRex	group_2
1222	1.90625	1	TRex	group_2
1223	0.09375	1	TRex	group_2
1224	0.625	1	TRex	group_2
1225	0.03125	1	TRex	group_2
1226	0.03125	1	TRex	group_2
1227	0.28125	1	TRex	group_2
1228	1.53125	1	TRex	group_2
1229	0.0625	1	TRex	group_2
1230	0.0625	1	TRex	group_2
1231	0.375	1	TRex	group_2
1232	1.875	1	TRex	group_2
1233	0.09375	1	TRex	group_2
1234	1.34375	1	TRex	group_2
1235	0.03125	1	TRex	group_2
1236	2.6875	1	TRex	group_2
1237	0.9375	1	TRex	group_2
1238	2.0	1	TRex	group_2
1239	4.0	1	TRex	group_2
1240	0.3125	1	TRex	group_2
1241	0.03125	1	TRex	group_2
1242	0.0625	1	TRex	group_2
1243	2.625	1	TRex	group_2
1244	0.03125	1	TRex	group_2
1245	4.15625	1	TRex	group_2
1246	0.3125	1	TRex	group_2
1247	1.40625	1	TRex	group_2
1248	0.03125	1	TRex	group_2
1249	3.78125	1	TRex	group_2
1250	0.53125	1	TRex	group_2
1251	1.59375	1	TRex	group_2
1252	0.03125	1	TRex	group_2
1253	3.0	1	TRex	group_2
1254	0.03125	1	TRex	group_2
1255	0.40625	1	TRex	group_2
1256	0.03125	1	TRex	group_2
1257	0.03125	1	TRex	group_2
1258	0.34375	1	TRex	group_2
1259	0.375	1	TRex	group_2
1260	0.03125	1	TRex	group_2
1261	0.21875	1	TRex	group_2
1262	0.59375	1	TRex	group_2
1263	0.75	1	TRex	group_2
1264	0.4375	1	TRex	group_2
1265	0.3125	1	TRex	group_2
1266	0.03125	1	TRex	group_2
1267	2.46875	1	TRex	group_2
1268	1.25	1	TRex	group_2
1269	4.625	1	TRex	group_2
1270	4.0	1	TRex	group_2
1271	0.03125	1	TRex	group_2
1272	0.03125	1	TRex	group_2
1273	2.625	1	TRex	group_2
1274	0.03125	1	TRex	group_2
1275	5.46875	1	TRex	group_2
1276	0.15625	1	TRex	group_2
1277	0.0625	1	TRex	group_2
1278	0.03125	1	TRex	group_2
1279	0.03125	1	TRex	group_2
1280	0.4375	1	TRex	group_2
1281	0.875	1	TRex	group_2
1282	3.125	1	TRex	group_2
1283	0.0625	1	TRex	group_2
1284	0.75	1	TRex	group_2
1285	2.375	1	TRex	group_2
1286	0.40625	1	TRex	group_2
1287	2.21875	1	TRex	group_2
1288	0.03125	1	TRex	group_2
1289	1.09375	1	TRex	group_2
1290	4.6875	1	TRex	group_2
1291	0.21875	1	TRex	group_2
1292	0.03125	1	TRex	group_2
1293	0.46875	1	TRex	group_2
1294	0.03125	1	TRex	group_2
1295	0.1875	1	TRex	group_2
1296	0.03125	1	TRex	group_2
1297	0.03125	1	TRex	group_2
1298	0.1875	1	TRex	group_2
1299	0.03125	1	TRex	group_2
1300	0.28125	1	TRex	group_2
1301	0.03125	1	TRex	group_2
1302	0.53125	1	TRex	group_2
1303	0.03125	1	TRex	group_2
1304	1.09375	1	TRex	group_2
1305	1.84375	1	TRex	group_2
1306	1.03125	1	TRex	group_2
1307	0.09375	1	TRex	group_2
1308	1.1875	1	TRex	group_2
1309	0.03125	1	TRex	group_2
1310	0.90625	1	TRex	group_2
1311	1.3125	1	TRex	group_2
1312	2.0625	1	TRex	group_2
1313	0.0625	1	TRex	group_2
1314	2.375	1	TRex	group_2
1315	2.0	1	TRex	group_2
1316	5.75	1	TRex	group_2
1317	1.75	1	TRex	group_2
1318	0.0625	1	TRex	group_2
1319	3.625	1	TRex	group_2
1320	3.5	1	TRex	group_2
1321	0.1875	1	TRex	group_2
1322	4.0	1	TRex	group_2
1323	0.03125	1	TRex	group_2
1324	0.21875	1	TRex	group_2
1325	0.03125	1	TRex	group_2
1326	0.03125	1	TRex	group_2
1327	0.28125	1	TRex	group_2
1328	0.03125	1	TRex	group_2
1329	0.21875	1	TRex	group_2
1330	0.03125	1	TRex	group_2
1331	1.0	1	TRex	group_2
1332	4.53125	1	TRex	group_2
1333	0.03125	1	TRex	group_2
1334	0.34375	1	TRex	group_2
1335	0.25	1	TRex	group_2
1336	0.09375	1	TRex	group_2
1337	0.28125	1	TRex	group_2
1338	0.53125	1	TRex	group_2
1339	0.0625	1	TRex	group_2
1340	0.3125	1	TRex	group_2
1341	0.03125	1	TRex	group_2
1342	0.28125	1	TRex	group_2
1343	0.34375	1	TRex	group_2
1344	0.8125	1	TRex	group_2
1345	1.28125	1	TRex	group_2
1346	1.59375	1	TRex	group_2
1347	0.3125	1	TRex	group_2
1348	0.09375	1	TRex	group_2
1349	7.59375	1	TRex	group_2
1350	0.25	1	TRex	group_2
1351	0.03125	1	TRex	group_2
1352	0.0625	1	TRex	group_2
1353	0.0625	1	TRex	group_2
1354	3.28125	1	TRex	group_2
1355	0.0625	1	TRex	group_2
1356	0.03125	1	TRex	group_2
1357	1.375	1	TRex	group_2
1358	0.5625	1	TRex	group_2
1359	0.3125	1	TRex	group_2
1360	0.0625	1	TRex	group_2
1361	1.03125	1	TRex	group_2
1362	2.78125	1	TRex	group_2
1363	0.0625	1	TRex	group_2
1364	0.28125	1	TRex	group_2
1365	0.03125	1	TRex	group_2
1366	0.03125	1	TRex	group_2
1367	0.03125	1	TRex	group_2
1368	0.25	1	TRex	group_2
1369	0.03125	1	TRex	group_2
1370	0.03125	1	TRex	group_2
1371	0.28125	1	TRex	group_2
1372	0.375	1	TRex	group_2
1373	0.03125	1	TRex	group_2
1374	0.40625	1	TRex	group_2
1375	0.0625	1	TRex	group_2
1376	0.28125	1	TRex	group_2
1377	2.875	1	TRex	group_2
1378	1.8125	1	TRex	group_2
1379	0.03125	1	TRex	group_2
1380	2.75	1	TRex	group_2
1381	2.75	1	TRex	group_2
1382	0.65625	1	TRex	group_2
1383	0.0625	1	TRex	group_2
1384	2.96875	1	TRex	group_2
1385	0.03125	1	TRex	group_2
1386	0.25	1	TRex	group_2
1387	1.1875	1	TRex	group_2
1388	0.03125	1	TRex	group_2
1389	0.03125	1	TRex	group_2
1390	0.96875	1	TRex	group_2
1391	0.8125	1	TRex	group_2
1392	0.03125	1	TRex	group_2
1393	0.03125	1	TRex	group_2
1394	0.71875	1	TRex	group_2
1395	8.8125	1	TRex	group_2
1396	2.53125	1	TRex	group_2
1397	0.03125	1	TRex	group_2
1398	0.65625	1	TRex	group_2
1399	5.25	1	TRex	group_2
1400	0.03125	1	TRex	group_2
1401	0.875	1	TRex	group_2
1402	0.75	1	TRex	group_2
1403	0.03125	1	TRex	group_2
1404	0.5625	1	TRex	group_2
1405	0.0625	1	TRex	group_2
1406	3.84375	1	TRex	group_2
1407	3.15625	1	TRex	group_2
1408	0.03125	1	TRex	group_2
1409	0.65625	1	TRex	group_2
1410	0.09375	1	TRex	group_2
1411	0.5625	1	TRex	group_2
1412	0.71875	1	TRex	group_2
1413	0.28125	1	TRex	group_2
1414	0.375	1	TRex	group_2
1415	0.3125	1	TRex	group_2
1416	0.03125	1	TRex	group_2
1417	0.03125	1	TRex	group_2
1418	0.21875	1	TRex	group_2
1419	0.03125	1	TRex	group_2
1420	0.03125	1	TRex	group_2
1421	0.59375	1	TRex	group_2
1422	1.65625	1	TRex	group_2
1423	1.03125	1	TRex	group_2
1424	0.0625	1	TRex	group_2
1425	3.40625	1	TRex	group_2
1426	0.3125	1	TRex	group_2
1427	0.125	1	TRex	group_2
1428	2.5	1	TRex	group_2
1429	0.03125	1	TRex	group_2
1430	0.46875	1	TRex	group_2
1431	0.90625	1	TRex	group_2
1432	1.5625	1	TRex	group_2
1433	0.09375	1	TRex	group_2
1434	0.03125	1	TRex	group_2
1435	0.3125	1	TRex	group_2
1436	5.28125	1	TRex	group_2
1437	0.03125	1	TRex	group_2
1438	0.21875	1	TRex	group_2
1439	0.0625	1	TRex	group_2
1440	2.5	1	TRex	group_2
1441	0.34375	1	TRex	group_2
1442	1.65625	1	TRex	group_2
1443	2.46875	1	TRex	group_2
1444	0.8125	1	TRex	group_2
1445	7.15625	1	TRex	group_2
1446	0.0625	1	TRex	group_2
1447	0.03125	1	TRex	group_2
1448	0.03125	1	TRex	group_2
1449	0.34375	1	TRex	group_2
1450	8.6875	1	TRex	group_2
1451	1.40625	1	TRex	group_2
1452	0.34375	1	TRex	group_2
1453	1.6875	1	TRex	group_2
1454	4.71875	1	TRex	group_2
1455	4.96875	1	TRex	group_2
1456	0.5	1	TRex	group_2
1457	0.375	1	TRex	group_2
1458	0.03125	1	TRex	group_2
1459	0.28125	1	TRex	group_2
1460	1.75	1	TRex	group_2
1461	0.25	1	TRex	group_2
1462	0.625	1	TRex	group_2
1463	5.28125	1	TRex	group_2
1464	5.46875	1	TRex	group_2
1465	0.25	1	TRex	group_2
1466	0.03125	1	TRex	group_2
1467	23.03125	1	TRex	group_2
1468	2.75	1	TRex	group_2
1469	3.125	1	TRex	group_2
1470	0.03125	1	TRex	group_2
1471	0.03125	1	TRex	group_2
1472	2.75	1	TRex	group_2
1473	1.21875	1	TRex	group_2
1474	2.0625	1	TRex	group_2
1475	0.03125	1	TRex	group_2
1476	3.59375	1	TRex	group_2
1477	1.25	1	TRex	group_2
1478	2.5	1	TRex	group_2
1479	3.4375	1	TRex	group_2
1480	3.03125	1	TRex	group_2
1481	0.78125	1	TRex	group_2
1482	0.03125	1	TRex	group_2
1483	0.03125	1	TRex	group_2
1484	1.34375	1	TRex	group_2
1485	1.40625	1	TRex	group_2
1486	0.03125	1	TRex	group_2
1487	0.03125	1	TRex	group_2
1488	0.21875	1	TRex	group_2
1489	0.03125	1	TRex	group_2
1490	0.03125	1	TRex	group_2
1491	0.25	1	TRex	group_2
1492	0.03125	1	TRex	group_2
1493	0.03125	1	TRex	group_2
1494	0.4375	1	TRex	group_2
1495	1.71875	1	TRex	group_2
1496	0.15625	1	TRex	group_2
1497	0.03125	1	TRex	group_2
1498	3.1875	1	TRex	group_2
1499	1.75	1	TRex	group_2
1500	0.03125	1	TRex	group_2
1501	0.03125	1	TRex	group_2
1502	0.59375	1	TRex	group_2
1503	1.5	1	TRex	group_2
1504	0.15625	1	TRex	group_2
1505	0.0625	1	TRex	group_2
1506	0.375	1	TRex	group_2
1507	2.375	1	TRex	group_2
1508	0.4375	1	TRex	group_2
1509	0.03125	1	TRex	group_2
1510	0.6875	1	TRex	group_2
1511	0.03125	1	TRex	group_2
1512	4.625	1	TRex	group_2
1513	0.125	1	TRex	group_2
1514	0.03125	1	TRex	group_2
1515	1.28125	1	TRex	group_2
1516	0.03125	1	TRex	group_2
1517	1.59375	1	TRex	group_2
1518	7.28125	1	TRex	group_2
1519	0.03125	1	TRex	group_2
1520	1.28125	1	TRex	group_2
1521	0.0625	1	TRex	group_2
1522	0.03125	1	TRex	group_2
1523	11.1875	1	TRex	group_2
1524	1.9375	1	TRex	group_2
1525	1.375	1	TRex	group_2
1526	1.4375	1	TRex	group_2
1527	1.3125	1	TRex	group_2
1528	15.96875	1	TRex	group_2
1529	0.75	1	TRex	group_2
1530	0.03125	1	TRex	group_2
1531	0.90625	1	TRex	group_2
1532	8.59375	1	TRex	group_2
1533	8.96875	1	TRex	group_2
1534	0.0625	1	TRex	group_2
1535	1.71875	1	TRex	group_2
1536	16.53125	1	TRex	group_2
1537	0.15625	1	TRex	group_2
1538	5.21875	1	TRex	group_2
1539	9.625	1	TRex	group_2
1540	4.1875	1	TRex	group_2
1541	4.59375	1	TRex	group_2
1542	1.9375	1	TRex	group_2
1543	15.3125	1	TRex	group_2
1544	0.84375	1	TRex	group_2
1545	7.0625	1	TRex	group_2
1546	0.21875	1	TRex	group_2
1547	13.6875	1	TRex	group_2
1548	11.5	1	TRex	group_2
1549	0.59375	1	TRex	group_2
1550	0.96875	1	TRex	group_2
1551	0.0625	1	TRex	group_2
1552	5.59375	1	TRex	group_2
1553	1.28125	1	TRex	group_2
1554	11.84375	1	TRex	group_2
1555	0.0625	1	TRex	group_2
1556	30.71875	1	TRex	group_2
1557	0.46875	1	TRex	group_2
1558	7.9375	1	TRex	group_2
1559	0.03125	1	TRex	group_2
1560	0.53125	1	TRex	group_2
1561	0.3125	1	TRex	group_2
1562	0.09375	1	TRex	group_2
1563	0.125	1	TRex	group_2
1564	7.5	1	TRex	group_2
1565	0.03125	1	TRex	group_2
1566	0.03125	1	TRex	group_2
1567	1.90625	1	TRex	group_2
1568	0.15625	1	TRex	group_2
1569	0.03125	1	TRex	group_2
1570	1.5625	1	TRex	group_2
1571	2.03125	1	TRex	group_2
1572	0.375	1	TRex	group_2
1573	4.1875	1	TRex	group_2
1574	0.78125	1	TRex	group_2
1575	1.09375	1	TRex	group_2
1576	0.40625	1	TRex	group_2
1577	0.34375	1	TRex	group_2
1578	0.375	1	TRex	group_2
1579	0.4375	1	TRex	group_2
1580	1.03125	1	TRex	group_2
1581	1.75	1	TRex	group_2
1582	0.78125	1	TRex	group_2
1583	0.3125	1	TRex	group_2
1584	8.09375	1	TRex	group_2
1585	0.03125	1	TRex	group_2
1586	3.0625	1	TRex	group_2
1587	2.4375	1	TRex	group_2
1588	0.375	1	TRex	group_2
1589	0.46875	1	TRex	group_2
1590	0.03125	1	TRex	group_2
1591	0.03125	1	TRex	group_2
1592	1.03125	1	TRex	group_2
1593	7.8125	1	TRex	group_2
1594	0.78125	1	TRex	group_2
1595	3.5	1	TRex	group_2
1596	0.03125	1	TRex	group_2
1597	1.59375	1	TRex	group_2
1598	0.0625	1	TRex	group_2
1599	0.03125	1	TRex	group_2
1600	0.4375	1	TRex	group_2
1601	0.34375	1	TRex	group_2
1602	2.25	1	TRex	group_2
1603	0.0625	1	TRex	group_2
1604	0.03125	1	TRex	group_2
1605	0.34375	1	TRex	group_2
1606	0.03125	1	TRex	group_2
1607	0.90625	1	TRex	group_2
1608	0.03125	1	TRex	group_2
1609	5.21875	1	TRex	group_2
1610	0.75	1	TRex	group_2
1611	4.21875	1	TRex	group_2
1612	5.625	1	TRex	group_2
1613	0.0625	1	TRex	group_2
1614	0.28125	1	TRex	group_2
1615	0.28125	1	TRex	group_2
1616	1.375	1	TRex	group_2
1617	12.9375	1	TRex	group_2
1618	0.0625	1	TRex	group_2
1619	0.25	1	TRex	group_2
1620	2.09375	1	TRex	group_2
1621	0.84375	1	TRex	group_2
1622	1.375	1	TRex	group_2
1623	2.15625	1	TRex	group_2
1624	1.25	1	TRex	group_2
1625	6.71875	1	TRex	group_2
1626	1.84375	1	TRex	group_2
1627	0.65625	1	TRex	group_2
1628	0.03125	1	TRex	group_2
1629	0.03125	1	TRex	group_2
1630	1.21875	1	TRex	group_2
1631	0.15625	1	TRex	group_2
1632	3.84375	1	TRex	group_2
1633	0.5625	1	TRex	group_2
1634	0.03125	1	TRex	group_2
1635	0.09375	1	TRex	group_2
1636	0.03125	1	TRex	group_2
1637	0.03125	1	TRex	group_2
1638	0.3125	1	TRex	group_2
1639	0.03125	1	TRex	group_2
1640	0.5625	1	TRex	group_2
1641	4.5	1	TRex	group_2
1642	3.28125	1	TRex	group_2
1643	1.03125	1	TRex	group_2
1644	0.625	1	TRex	group_2
1645	0.03125	1	TRex	group_2
1646	0.40625	1	TRex	group_2
1647	0.28125	1	TRex	group_2
1648	2.15625	1	TRex	group_2
1649	0.3125	1	TRex	group_2
1650	0.03125	1	TRex	group_2
1651	0.0625	1	TRex	group_2
1652	2.875	1	TRex	group_2
1653	0.03125	1	TRex	group_2
1654	0.03125	1	TRex	group_2
1655	0.125	1	TRex	group_2
1656	3.84375	1	TRex	group_2
1657	0.21875	1	TRex	group_2
1658	0.03125	1	TRex	group_2
1659	0.03125	1	TRex	group_2
1660	0.21875	1	TRex	group_2
1661	0.03125	1	TRex	group_2
1662	0.03125	1	TRex	group_2
1663	5.21875	1	TRex	group_2
1664	0.34375	1	TRex	group_2
1665	0.09375	1	TRex	group_2
1666	0.3125	1	TRex	group_2
1667	0.59375	1	TRex	group_2
1668	0.40625	1	TRex	group_2
1669	0.03125	1	TRex	group_2
1670	0.34375	1	TRex	group_2
1671	2.625	1	TRex	group_2
1672	3.46875	1	TRex	group_2
1673	1.21875	1	TRex	group_2
1674	0.53125	1	TRex	group_2
1675	2.4375	1	TRex	group_2
1676	5.5625	1	TRex	group_2
1677	1.09375	1	TRex	group_2
1678	0.28125	1	TRex	group_2
1679	0.03125	1	TRex	group_2
1680	12.125	1	TRex	group_2
1681	0.03125	1	TRex	group_2
1682	0.3125	1	TRex	group_2
1683	0.65625	1	TRex	group_2
1684	0.5625	1	TRex	group_2
1685	0.03125	1	TRex	group_2
1686	0.4375	1	TRex	group_2
1687	0.8125	1	TRex	group_2
1688	0.6875	1	TRex	group_2
1689	0.125	1	TRex	group_2
1690	0.03125	1	TRex	group_2
1691	0.03125	1	TRex	group_2
1692	1.375	1	TRex	group_2
1693	3.03125	1	TRex	group_2
1694	0.1875	1	TRex	group_2
1695	0.40625	1	TRex	group_2
1696	0.03125	1	TRex	group_2
1697	0.34375	1	TRex	group_2
1698	0.9375	1	TRex	group_2
1699	10.53125	1	TRex	group_2
1700	0.90625	1	TRex	group_2
1701	0.03125	1	TRex	group_2
1702	4.71875	1	TRex	group_2
1703	1.90625	1	TRex	group_2
1704	0.625	1	TRex	group_2
1705	0.90625	1	TRex	group_2
1706	5.6875	1	TRex	group_2
1707	1.1875	1	TRex	group_2
1708	0.5625	1	TRex	group_2
1709	0.3125	1	TRex	group_2
1710	3.40625	1	TRex	group_2
1711	1.125	1	TRex	group_2
1712	7.1875	1	TRex	group_2
1713	0.375	1	TRex	group_2
1714	0.59375	1	TRex	group_2
1715	0.03125	1	TRex	group_2
1716	4.40625	1	TRex	group_2
1717	0.875	1	TRex	group_2
1718	0.34375	1	TRex	group_2
1719	0.03125	1	TRex	group_2
1720	0.21875	1	TRex	group_2
1721	0.03125	1	TRex	group_2
1722	0.03125	1	TRex	group_2
1723	0.3125	1	TRex	group_2
1724	0.03125	1	TRex	group_2
1725	0.03125	1	TRex	group_2
1726	0.375	1	TRex	group_2
1727	0.03125	1	TRex	group_2
1728	0.03125	1	TRex	group_2
1729	0.5	1	TRex	group_2
1730	0.25	1	TRex	group_2
1731	0.03125	1	TRex	group_2
1732	0.03125	1	TRex	group_2
1733	0.09375	1	TRex	group_2
1734	5.21875	1	TRex	group_2
1735	0.0625	1	TRex	group_2
1736	2.21875	1	TRex	group_2
1737	7.5625	1	TRex	group_2
1738	0.0625	1	TRex	group_2
1739	0.15625	1	TRex	group_2
1740	1.5	1	TRex	group_2
1741	0.09375	1	TRex	group_2
1742	3.0	1	TRex	group_2
1743	4.25	1	TRex	group_2
1744	5.75	1	TRex	group_2
1745	0.375	1	TRex	group_2
1746	0.0625	1	TRex	group_2
1747	0.375	1	TRex	group_2
1748	2.9375	1	TRex	group_2
1749	1.125	1	TRex	group_2
1750	0.34375	1	TRex	group_2
1751	0.40625	1	TRex	group_2
1752	0.6875	1	TRex	group_2
1753	0.34375	1	TRex	group_2
1754	0.34375	1	TRex	group_2
1755	2.09375	1	TRex	group_2
1756	8.375	1	TRex	group_2
1757	5.125	1	TRex	group_2
1758	5.46875	1	TRex	group_2
1759	0.375	1	TRex	group_2
1760	0.8125	1	TRex	group_2
1761	4.5	1	TRex	group_2
1762	6.03125	1	TRex	group_2
1763	0.40625	1	TRex	group_2
1764	0.9375	1	TRex	group_2
1765	0.03125	1	TRex	group_2
1766	0.28125	1	TRex	group_2
1767	0.03125	1	TRex	group_2
1768	0.03125	1	TRex	group_2
1769	0.3125	1	TRex	group_2
1770	0.0625	1	TRex	group_2
1771	1.25	1	TRex	group_2
1772	0.625	1	TRex	group_2
1773	1.5625	1	TRex	group_2
1774	0.0625	1	TRex	group_2
1775	11.65625	1	TRex	group_2
1776	1.0	1	TRex	group_2
1777	0.875	1	TRex	group_2
1778	0.03125	1	TRex	group_2
1779	2.5625	1	TRex	group_2
1780	7.625	1	TRex	group_2
1781	4.125	1	TRex	group_2
1782	1.40625	1	TRex	group_2
1783	0.03125	1	TRex	group_2
1784	0.03125	1	TRex	group_2
1785	0.46875	1	TRex	group_2
1786	0.03125	1	TRex	group_2
1787	2.40625	1	TRex	group_2
1788	3.5625	1	TRex	group_2
1789	0.3125	1	TRex	group_2
1790	4.0	1	TRex	group_2
1791	0.0625	1	TRex	group_2
1792	0.65625	1	TRex	group_2
1793	0.21875	1	TRex	group_2
1794	0.03125	1	TRex	group_2
1795	0.0625	1	TRex	group_2
1796	7.84375	1	TRex	group_2
1797	0.4375	1	TRex	group_2
1798	0.46875	1	TRex	group_2
1799	0.3125	1	TRex	group_2
1800	0.03125	1	TRex	group_2
1801	0.03125	1	TRex	group_2
1802	0.25	1	TRex	group_2
1803	0.03125	1	TRex	group_2
1804	0.34375	1	TRex	group_2
1805	0.34375	1	TRex	group_2
1806	0.03125	1	TRex	group_2
1807	2.0	1	TRex	group_2
1808	1.1875	1	TRex	group_2
1809	1.125	1	TRex	group_2
1810	9.75	1	TRex	group_2
1811	0.34375	1	TRex	group_2
1812	0.0625	1	TRex	group_2
1813	0.375	1	TRex	group_2
1814	0.28125	1	TRex	group_2
1815	2.875	1	TRex	group_2
1816	1.125	1	TRex	group_2
1817	0.03125	1	TRex	group_2
1818	0.71875	1	TRex	group_2
1819	0.03125	1	TRex	group_2
1820	0.65625	1	TRex	group_2
1821	0.03125	1	TRex	group_2
1822	5.125	1	TRex	group_2
1823	0.375	1	TRex	group_2
1824	2.0	1	TRex	group_2
1825	1.21875	1	TRex	group_2
1826	3.8125	1	TRex	group_2
1827	0.03125	1	TRex	group_2
1828	6.53125	1	TRex	group_2
1829	0.6875	1	TRex	group_2
1830	0.03125	1	TRex	group_2
1831	1.28125	1	TRex	group_2
1832	4.5	1	TRex	group_2
1833	4.25	1	TRex	group_2
1834	2.0	1	TRex	group_2
1835	0.03125	1	TRex	group_2
1836	0.0625	1	TRex	group_2
1837	0.03125	1	TRex	group_2
1838	0.03125	1	TRex	group_2
1839	0.03125	1	TRex	group_2
1840	0.03125	1	TRex	group_2
1841	0.03125	1	TRex	group_2
1842	0.03125	1	TRex	group_2
1843	0.03125	1	TRex	group_2
1844	0.5625	1	TRex	group_2
1845	4.5625	1	TRex	group_2
1846	0.34375	1	TRex	group_2
1847	0.03125	1	TRex	group_2
1848	0.28125	1	TRex	group_2
1849	0.375	1	TRex	group_2
1850	0.09375	1	TRex	group_2
1851	0.1875	1	TRex	group_2
1852	0.03125	1	TRex	group_2
1853	0.03125	1	TRex	group_2
1854	0.5	1	TRex	group_2
1855	0.25	1	TRex	group_2
1856	0.09375	1	TRex	group_2
1857	0.25	1	TRex	group_2
1858	0.0625	1	TRex	group_2
1859	2.34375	1	TRex	group_2
1860	0.4375	1	TRex	group_2
1861	0.375	1	TRex	group_2
1862	0.03125	1	TRex	group_2
1863	4.6875	1	TRex	group_2
1864	0.1875	1	TRex	group_2
1865	0.03125	1	TRex	group_2
1866	0.03125	1	TRex	group_2
1867	5.0	1	TRex	group_2
1868	0.03125	1	TRex	group_2
1869	0.3125	1	TRex	group_2
1870	1.03125	1	TRex	group_2
1871	0.4375	1	TRex	group_2
1872	1.65625	1	TRex	group_2
1873	1.625	1	TRex	group_2
1874	0.03125	1	TRex	group_2
1875	0.03125	1	TRex	group_2
1876	1.1875	1	TRex	group_2
1877	3.4375	1	TRex	group_2
1878	1.65625	1	TRex	group_2
1879	7.40625	1	TRex	group_2
1880	13.46875	1	TRex	group_2
1881	4.3125	1	TRex	group_2
1882	0.03125	1	TRex	group_2
1883	22.53125	1	TRex	group_2
1884	0.21875	1	TRex	group_2
1885	0.90625	1	TRex	group_2
1886	20.9375	1	TRex	group_2
1887	0.28125	1	TRex	group_2
1888	10.4375	1	TRex	group_2
1889	13.90625	1	TRex	group_2
1890	4.40625	1	TRex	group_2
1891	0.03125	1	TRex	group_2
1892	15.0625	1	TRex	group_2
1893	6.34375	1	TRex	group_2
1894	8.03125	1	TRex	group_2
1895	6.53125	1	TRex	group_2
1896	11.125	1	TRex	group_2
1897	4.1875	1	TRex	group_2
1898	19.0	1	TRex	group_2
1899	0.34375	1	TRex	group_2
1900	16.9375	1	TRex	group_2
1901	37.75	1	TRex	group_2
1902	2.25	1	TRex	group_2
1903	0.03125	1	TRex	group_2
1904	4.3125	1	TRex	group_2
1905	4.0625	1	TRex	group_2
1906	6.3125	1	TRex	group_2
1907	0.15625	1	TRex	group_2
1908	0.03125	1	TRex	group_2
1909	1.65625	1	TRex	group_2
1910	1.59375	1	TRex	group_2
1911	27.1875	1	TRex	group_2
1912	0.03125	1	TRex	group_2
1913	13.6875	1	TRex	group_2
1914	2.71875	1	TRex	group_2
1915	0.09375	1	TRex	group_2
1916	5.53125	1	TRex	group_2
1917	0.09375	1	TRex	group_2
1918	8.8125	1	TRex	group_2
1919	3.78125	1	TRex	group_2
1920	0.0625	1	TRex	group_2
1921	32.21875	1	TRex	group_2
1922	12.90625	1	TRex	group_2
1923	5.90625	1	TRex	group_2
1924	4.8125	1	TRex	group_2
1925	32.03125	1	TRex	group_2
1926	17.25	1	TRex	group_2
1927	2.375	1	TRex	group_2
1928	0.0625	1	TRex	group_2
1929	22.8125	1	TRex	group_2
1930	0.03125	1	TRex	group_2
1931	0.0625	1	TRex	group_2
1932	3.03125	1	TRex	group_2
1933	23.65625	1	TRex	group_2
1934	13.25	1	TRex	group_2
1935	0.0625	1	TRex	group_2
1936	4.59375	1	TRex	group_2
1937	15.4375	1	TRex	group_2
1938	0.03125	1	TRex	group_2
1939	5.4375	1	TRex	group_2
1940	0.03125	1	TRex	group_2
1941	0.1875	1	TRex	group_2
1942	0.09375	1	TRex	group_2
1943	0.03125	1	TRex	group_2
1944	36.28125	1	TRex	group_2
1945	10.3125	1	TRex	group_2
1946	0.03125	1	TRex	group_2
1947	0.03125	1	TRex	group_2
1948	5.09375	1	TRex	group_2
1949	14.46875	1	TRex	group_2
1950	2.25	1	TRex	group_2
1951	14.25	1	TRex	group_2
1952	5.6875	1	TRex	group_2
1953	5.40625	1	TRex	group_2
1954	36.25	1	TRex	group_2
1955	12.65625	1	TRex	group_2
1956	0.46875	1	TRex	group_2
1957	0.40625	1	TRex	group_2
1958	14.90625	1	TRex	group_2
1959	0.03125	1	TRex	group_2
1960	0.03125	1	TRex	group_2
1961	3.25	1	TRex	group_2
1962	0.1875	1	TRex	group_2
1963	0.1875	1	TRex	group_2
1964	8.6875	1	TRex	group_2
1965	0.0625	1	TRex	group_2
1966	0.0625	1	TRex	group_2
1967	2.59375	1	TRex	group_2
1968	1.84375	1	TRex	group_2
1969	28.21875	1	TRex	group_2
1970	17.03125	1	TRex	group_2
1971	35.84375	1	TRex	group_2
1972	0.03125	1	TRex	group_2
1973	0.0625	1	TRex	group_2
1974	0.03125	1	TRex	group_2
1975	0.03125	1	TRex	group_2
1976	0.03125	1	TRex	group_2
1977	23.9375	1	TRex	group_2
1978	0.0625	1	TRex	group_2
1979	3.65625	1	TRex	group_2
1980	0.625	1	TRex	group_2
1981	5.96875	1	TRex	group_2
1982	29.53125	1	TRex	group_2
1983	0.1875	1	TRex	group_2
1984	0.03125	1	TRex	group_2
1985	0.03125	1	TRex	group_2
1986	0.71875	1	TRex	group_2
1987	10.78125	1	TRex	group_2
1988	33.6875	1	TRex	group_2
1989	0.25	1	TRex	group_2
1990	41.84375	1	TRex	group_2
1991	0.03125	1	TRex	group_2
1992	1.125	1	TRex	group_2
1993	4.21875	1	TRex	group_2
1994	0.21875	1	TRex	group_2
1995	0.09375	1	TRex	group_2
1996	19.0625	1	TRex	group_2
1997	20.3125	1	TRex	group_2
1998	14.0	1	TRex	group_2
[truncated: 79,055 more rows]
