# Supplementary material for: TRex, a fast multi-animal tracking system with markerless identification, and 2D estimation of posture and visual fields
Source: eLife. 2021 Feb 26;10:e64000. doi: 10.7554/eLife.64000 (PMC8096434; doi:10.7554/eLife.64000)
Supplement: Figure 5—source data 1. [file elife-64000-fig5-data1.csv]

	video	software	individual video minutes (N * min)	maximum memory (GB)	bin
3	group_1	trex	100.609375	4.7913055419921875	0
4	group_2	trex	100.57291666666666	6.307730674743652	0
5	group_3	trex	101.765625	5.494068145751953	0
9	video_example_100fish_1min	trex	100.05208333333333	13.447113037109375	0
2	flies_N59	trex	590.4820261437909	17.412320137023926	1
7	guppy_8_t36_d15_20191212_085800	trex	576.0	8.40723991394043	1
6	guppy_8_t20_d1_20190512_115801	trex	1585.7485714285715	28.61952495574951	3
8	guppy_8_t46_d1_20191207_102508	trex	1563.008888888889	21.9852294921875	3
3	group_1	idtracker.ai	100.609375	29.430191040039062	0
4	group_2	idtracker.ai	100.57291666666666	28.847399711608887	0
5	group_3	idtracker.ai	101.765625	29.319031715393066	0
9	video_example_100fish_1min	idtracker.ai	100.05208333333333	24.38792324066162	0
2	flies_N59	idtracker.ai	590.4820261437909	50.256967544555664	1
7	guppy_8_t36_d15_20191212_085800	idtracker.ai	576.0	91.25718402862549	1
6	guppy_8_t20_d1_20190512_115801	idtracker.ai	1585.7485714285715	115.36566257476807	3
8	guppy_8_t46_d1_20191207_102508	idtracker.ai	1563.008888888889	98.04244613647461	3
