# Supplementary material for: TRex, a fast multi-animal tracking system with markerless identification, and 2D estimation of posture and visual fields
Source: eLife. 2021 Feb 26;10:e64000. doi: 10.7554/eLife.64000 (PMC8096434; doi:10.7554/eLife.64000)
Supplement: Table 3—source data 1. — For each permutation of trials from TRex and idtracker.ai for the same video, the algorithm sought to match the trajectories of the same physical individuals in both trials with each other by finding the ones with the smallest mean euclidean distance per frame between them. Available from Walter et al., 2020 as T2_source_data.zip. [file elife-64000-table3-data1.csv]

	video	trex_trial	idtracker_trial	trex_id	idtracker_id
0	group_1	release_1	1	8	8
1	group_1	release_1	1	1	1
2	group_1	release_1	1	5	5
3	group_1	release_1	1	3	3
4	group_1	release_1	1	6	6
5	group_1	release_1	1	7	7
6	group_1	release_1	1	9	9
7	group_1	release_1	1	2	2
8	group_1	release_1	1	4	4
9	group_1	release_1	1	0	0
10	group_2	release_1	1	8	8
11	group_2	release_1	1	4	4
12	group_2	release_1	1	9	9
13	group_2	release_1	1	7	7
14	group_2	release_1	1	6	6
15	group_2	release_1	1	1	1
16	group_2	release_1	1	0	0
17	group_2	release_1	1	3	3
18	group_2	release_1	1	5	5
19	group_2	release_1	1	2	2
20	group_3	release_1	1	8	8
21	group_3	release_1	1	4	4
22	group_3	release_1	1	1	1
23	group_3	release_1	1	9	9
24	group_3	release_1	1	7	7
25	group_3	release_1	1	3	3
26	group_3	release_1	1	6	6
27	group_3	release_1	1	0	0
28	group_3	release_1	1	2	2
29	group_3	release_1	1	5	5
30	guppy_8_t36_d15_20191212_085800	release_1	1	7	7
31	guppy_8_t36_d15_20191212_085800	release_1	1	1	1
32	guppy_8_t36_d15_20191212_085800	release_1	1	5	5
33	guppy_8_t36_d15_20191212_085800	release_1	1	0	0
34	guppy_8_t36_d15_20191212_085800	release_1	1	2	2
35	guppy_8_t36_d15_20191212_085800	release_1	1	4	4
36	guppy_8_t36_d15_20191212_085800	release_1	1	3	3
37	guppy_8_t36_d15_20191212_085800	release_1	1	6	6
38	video_example_100fish_1min	release_1	1	73	73
39	video_example_100fish_1min	release_1	1	34	34
40	video_example_100fish_1min	release_1	1	77	77
41	video_example_100fish_1min	release_1	1	88	88
42	video_example_100fish_1min	release_1	1	66	66
43	video_example_100fish_1min	release_1	1	97	97
44	video_example_100fish_1min	release_1	1	41	41
45	video_example_100fish_1min	release_1	1	18	18
46	video_example_100fish_1min	release_1	1	96	96
47	video_example_100fish_1min	release_1	1	36	36
48	video_example_100fish_1min	release_1	1	17	17
49	video_example_100fish_1min	release_1	1	16	16
50	video_example_100fish_1min	release_1	1	82	82
51	video_example_100fish_1min	release_1	1	15	15
52	video_example_100fish_1min	release_1	1	14	14
53	video_example_100fish_1min	release_1	1	83	83
54	video_example_100fish_1min	release_1	1	13	13
55	video_example_100fish_1min	release_1	1	21	21
56	video_example_100fish_1min	release_1	1	12	12
57	video_example_100fish_1min	release_1	1	11	11
58	video_example_100fish_1min	release_1	1	10	10
59	video_example_100fish_1min	release_1	1	45	45
60	video_example_100fish_1min	release_1	1	75	75
61	video_example_100fish_1min	release_1	1	71	71
62	video_example_100fish_1min	release_1	1	52	52
63	video_example_100fish_1min	release_1	1	93	93
64	video_example_100fish_1min	release_1	1	95	95
65	video_example_100fish_1min	release_1	1	26	26
66	video_example_100fish_1min	release_1	1	43	43
67	video_example_100fish_1min	release_1	1	65	65
68	video_example_100fish_1min	release_1	1	8	8
69	video_example_100fish_1min	release_1	1	46	46
70	video_example_100fish_1min	release_1	1	57	57
71	video_example_100fish_1min	release_1	1	20	20
72	video_example_100fish_1min	release_1	1	98	98
73	video_example_100fish_1min	release_1	1	32	32
74	video_example_100fish_1min	release_1	1	48	48
75	video_example_100fish_1min	release_1	1	78	78
76	video_example_100fish_1min	release_1	1	76	76
77	video_example_100fish_1min	release_1	1	9	9
78	video_example_100fish_1min	release_1	1	81	81
79	video_example_100fish_1min	release_1	1	87	87
80	video_example_100fish_1min	release_1	1	25	25
81	video_example_100fish_1min	release_1	1	29	29
82	video_example_100fish_1min	release_1	1	53	53
83	video_example_100fish_1min	release_1	1	85	85
84	video_example_100fish_1min	release_1	1	7	7
85	video_example_100fish_1min	release_1	1	62	62
86	video_example_100fish_1min	release_1	1	30	30
87	video_example_100fish_1min	release_1	1	59	59
88	video_example_100fish_1min	release_1	1	80	80
89	video_example_100fish_1min	release_1	1	84	84
90	video_example_100fish_1min	release_1	1	47	47
91	video_example_100fish_1min	release_1	1	99	99
92	video_example_100fish_1min	release_1	1	6	6
93	video_example_100fish_1min	release_1	1	54	54
94	video_example_100fish_1min	release_1	1	31	31
95	video_example_100fish_1min	release_1	1	38	38
96	video_example_100fish_1min	release_1	1	28	28
97	video_example_100fish_1min	release_1	1	5	5
98	video_example_100fish_1min	release_1	1	89	89
99	video_example_100fish_1min	release_1	1	33	33
100	video_example_100fish_1min	release_1	1	4	4
101	video_example_100fish_1min	release_1	1	3	3
102	video_example_100fish_1min	release_1	1	39	39
103	video_example_100fish_1min	release_1	1	2	2
104	video_example_100fish_1min	release_1	1	50	50
105	video_example_100fish_1min	release_1	1	37	37
106	video_example_100fish_1min	release_1	1	60	60
107	video_example_100fish_1min	release_1	1	58	58
108	video_example_100fish_1min	release_1	1	24	24
109	video_example_100fish_1min	release_1	1	79	79
110	video_example_100fish_1min	release_1	1	56	56
111	video_example_100fish_1min	release_1	1	68	68
112	video_example_100fish_1min	release_1	1	67	67
113	video_example_100fish_1min	release_1	1	94	94
114	video_example_100fish_1min	release_1	1	19	19
115	video_example_100fish_1min	release_1	1	23	23
116	video_example_100fish_1min	release_1	1	72	72
117	video_example_100fish_1min	release_1	1	49	49
118	video_example_100fish_1min	release_1	1	51	51
119	video_example_100fish_1min	release_1	1	69	69
120	video_example_100fish_1min	release_1	1	42	42
121	video_example_100fish_1min	release_1	1	63	63
122	video_example_100fish_1min	release_1	1	27	27
123	video_example_100fish_1min	release_1	1	55	55
124	video_example_100fish_1min	release_1	1	40	40
125	video_example_100fish_1min	release_1	1	90	90
126	video_example_100fish_1min	release_1	1	70	70
127	video_example_100fish_1min	release_1	1	1	1
128	video_example_100fish_1min	release_1	1	74	74
129	video_example_100fish_1min	release_1	1	64	64
130	video_example_100fish_1min	release_1	1	92	92
131	video_example_100fish_1min	release_1	1	61	61
132	video_example_100fish_1min	release_1	1	91	91
133	video_example_100fish_1min	release_1	1	0	0
134	video_example_100fish_1min	release_1	1	35	35
135	video_example_100fish_1min	release_1	1	44	44
136	video_example_100fish_1min	release_1	1	22	22
137	video_example_100fish_1min	release_1	1	86	86
138	guppy_8_t46_d1_20191207_102508	release_1	1	7	7
139	guppy_8_t46_d1_20191207_102508	release_1	1	2	2
140	guppy_8_t46_d1_20191207_102508	release_1	1	6	6
141	guppy_8_t46_d1_20191207_102508	release_1	1	0	0
142	guppy_8_t46_d1_20191207_102508	release_1	1	4	4
143	guppy_8_t46_d1_20191207_102508	release_1	1	5	5
144	guppy_8_t46_d1_20191207_102508	release_1	1	1	1
145	guppy_8_t46_d1_20191207_102508	release_1	1	3	3
146	guppy_8_t20_d1_20190512_115801	release_1	1	1	1
147	guppy_8_t20_d1_20190512_115801	release_1	1	2	2
148	guppy_8_t20_d1_20190512_115801	release_1	1	6	6
149	guppy_8_t20_d1_20190512_115801	release_1	1	3	3
150	guppy_8_t20_d1_20190512_115801	release_1	1	0	0
151	guppy_8_t20_d1_20190512_115801	release_1	1	5	5
152	guppy_8_t20_d1_20190512_115801	release_1	1	4	4
153	guppy_8_t20_d1_20190512_115801	release_1	1	7	7
154	flies_N59	release_1	1	52	52
155	flies_N59	release_1	1	25	25
156	flies_N59	release_1	1	13	13
157	flies_N59	release_1	1	12	12
158	flies_N59	release_1	1	17	17
159	flies_N59	release_1	1	11	11
160	flies_N59	release_1	1	15	15
161	flies_N59	release_1	1	58	58
162	flies_N59	release_1	1	56	56
163	flies_N59	release_1	1	14	14
164	flies_N59	release_1	1	33	33
165	flies_N59	release_1	1	53	53
166	flies_N59	release_1	1	30	30
167	flies_N59	release_1	1	10	10
168	flies_N59	release_1	1	9	9
169	flies_N59	release_1	1	16	16
170	flies_N59	release_1	1	8	8
171	flies_N59	release_1	1	51	51
172	flies_N59	release_1	1	7	7
173	flies_N59	release_1	1	31	31
174	flies_N59	release_1	1	47	47
175	flies_N59	release_1	1	32	32
176	flies_N59	release_1	1	26	26
177	flies_N59	release_1	1	57	57
178	flies_N59	release_1	1	42	42
179	flies_N59	release_1	1	35	35
180	flies_N59	release_1	1	27	27
181	flies_N59	release_1	1	20	20
182	flies_N59	release_1	1	38	38
183	flies_N59	release_1	1	21	21
184	flies_N59	release_1	1	46	46
185	flies_N59	release_1	1	49	49
186	flies_N59	release_1	1	6	6
187	flies_N59	release_1	1	44	44
188	flies_N59	release_1	1	24	24
189	flies_N59	release_1	1	29	29
190	flies_N59	release_1	1	28	28
191	flies_N59	release_1	1	5	5
192	flies_N59	release_1	1	34	34
193	flies_N59	release_1	1	23	23
194	flies_N59	release_1	1	4	4
195	flies_N59	release_1	1	45	45
196	flies_N59	release_1	1	39	39
197	flies_N59	release_1	1	3	3
198	flies_N59	release_1	1	2	2
199	flies_N59	release_1	1	37	37
200	flies_N59	release_1	1	55	55
201	flies_N59	release_1	1	43	43
202	flies_N59	release_1	1	1	1
203	flies_N59	release_1	1	40	40
204	flies_N59	release_1	1	22	22
205	flies_N59	release_1	1	41	41
206	flies_N59	release_1	1	48	48
207	flies_N59	release_1	1	36	36
208	flies_N59	release_1	1	19	19
209	flies_N59	release_1	1	0	0
210	flies_N59	release_1	1	18	18
211	flies_N59	release_1	1	54	54
212	flies_N59	release_1	1	50	50
213	group_1	release_1	2	8	8
214	group_1	release_1	2	1	1
215	group_1	release_1	2	5	5
216	group_1	release_1	2	3	3
217	group_1	release_1	2	6	6
218	group_1	release_1	2	7	7
219	group_1	release_1	2	9	9
220	group_1	release_1	2	2	2
221	group_1	release_1	2	4	4
222	group_1	release_1	2	0	0
223	group_2	release_1	2	8	8
224	group_2	release_1	2	4	4
225	group_2	release_1	2	9	9
226	group_2	release_1	2	7	7
227	group_2	release_1	2	6	6
228	group_2	release_1	2	1	1
229	group_2	release_1	2	0	0
230	group_2	release_1	2	3	3
231	group_2	release_1	2	5	5
232	group_2	release_1	2	2	2
233	group_3	release_1	2	8	8
234	group_3	release_1	2	4	4
235	group_3	release_1	2	1	1
236	group_3	release_1	2	9	9
237	group_3	release_1	2	7	7
238	group_3	release_1	2	3	3
239	group_3	release_1	2	6	6
240	group_3	release_1	2	0	0
241	group_3	release_1	2	2	2
242	group_3	release_1	2	5	5
243	guppy_8_t36_d15_20191212_085800	release_1	2	7	7
244	guppy_8_t36_d15_20191212_085800	release_1	2	1	1
245	guppy_8_t36_d15_20191212_085800	release_1	2	5	5
246	guppy_8_t36_d15_20191212_085800	release_1	2	0	0
247	guppy_8_t36_d15_20191212_085800	release_1	2	2	2
248	guppy_8_t36_d15_20191212_085800	release_1	2	4	4
249	guppy_8_t36_d15_20191212_085800	release_1	2	3	3
250	guppy_8_t36_d15_20191212_085800	release_1	2	6	6
251	video_example_100fish_1min	release_1	2	73	73
252	video_example_100fish_1min	release_1	2	34	34
253	video_example_100fish_1min	release_1	2	77	77
254	video_example_100fish_1min	release_1	2	88	88
255	video_example_100fish_1min	release_1	2	66	66
256	video_example_100fish_1min	release_1	2	96	96
257	video_example_100fish_1min	release_1	2	41	41
258	video_example_100fish_1min	release_1	2	18	18
259	video_example_100fish_1min	release_1	2	97	97
260	video_example_100fish_1min	release_1	2	36	36
261	video_example_100fish_1min	release_1	2	17	17
262	video_example_100fish_1min	release_1	2	16	16
263	video_example_100fish_1min	release_1	2	82	82
264	video_example_100fish_1min	release_1	2	15	15
265	video_example_100fish_1min	release_1	2	14	14
266	video_example_100fish_1min	release_1	2	83	83
267	video_example_100fish_1min	release_1	2	13	13
268	video_example_100fish_1min	release_1	2	21	21
269	video_example_100fish_1min	release_1	2	12	12
270	video_example_100fish_1min	release_1	2	11	11
271	video_example_100fish_1min	release_1	2	10	10
272	video_example_100fish_1min	release_1	2	45	45
273	video_example_100fish_1min	release_1	2	75	75
274	video_example_100fish_1min	release_1	2	71	71
275	video_example_100fish_1min	release_1	2	52	52
276	video_example_100fish_1min	release_1	2	93	93
277	video_example_100fish_1min	release_1	2	95	95
278	video_example_100fish_1min	release_1	2	26	26
279	video_example_100fish_1min	release_1	2	43	43
280	video_example_100fish_1min	release_1	2	65	65
281	video_example_100fish_1min	release_1	2	8	8
282	video_example_100fish_1min	release_1	2	46	46
283	video_example_100fish_1min	release_1	2	57	57
284	video_example_100fish_1min	release_1	2	20	20
285	video_example_100fish_1min	release_1	2	98	98
286	video_example_100fish_1min	release_1	2	32	32
287	video_example_100fish_1min	release_1	2	48	48
288	video_example_100fish_1min	release_1	2	78	78
289	video_example_100fish_1min	release_1	2	76	76
290	video_example_100fish_1min	release_1	2	9	9
291	video_example_100fish_1min	release_1	2	81	81
292	video_example_100fish_1min	release_1	2	87	87
293	video_example_100fish_1min	release_1	2	25	25
294	video_example_100fish_1min	release_1	2	29	29
295	video_example_100fish_1min	release_1	2	53	53
296	video_example_100fish_1min	release_1	2	85	85
297	video_example_100fish_1min	release_1	2	7	7
298	video_example_100fish_1min	release_1	2	62	62
299	video_example_100fish_1min	release_1	2	30	30
300	video_example_100fish_1min	release_1	2	59	59
301	video_example_100fish_1min	release_1	2	80	80
302	video_example_100fish_1min	release_1	2	84	84
303	video_example_100fish_1min	release_1	2	47	47
304	video_example_100fish_1min	release_1	2	99	99
305	video_example_100fish_1min	release_1	2	6	6
306	video_example_100fish_1min	release_1	2	54	54
307	video_example_100fish_1min	release_1	2	31	31
308	video_example_100fish_1min	release_1	2	38	38
309	video_example_100fish_1min	release_1	2	28	28
310	video_example_100fish_1min	release_1	2	5	5
311	video_example_100fish_1min	release_1	2	89	89
312	video_example_100fish_1min	release_1	2	33	33
313	video_example_100fish_1min	release_1	2	4	4
314	video_example_100fish_1min	release_1	2	3	3
315	video_example_100fish_1min	release_1	2	39	39
316	video_example_100fish_1min	release_1	2	2	2
317	video_example_100fish_1min	release_1	2	50	50
318	video_example_100fish_1min	release_1	2	37	37
319	video_example_100fish_1min	release_1	2	60	60
320	video_example_100fish_1min	release_1	2	58	58
321	video_example_100fish_1min	release_1	2	24	24
322	video_example_100fish_1min	release_1	2	79	79
323	video_example_100fish_1min	release_1	2	56	56
324	video_example_100fish_1min	release_1	2	68	68
325	video_example_100fish_1min	release_1	2	67	67
326	video_example_100fish_1min	release_1	2	94	94
327	video_example_100fish_1min	release_1	2	19	19
328	video_example_100fish_1min	release_1	2	23	23
329	video_example_100fish_1min	release_1	2	72	72
330	video_example_100fish_1min	release_1	2	49	49
331	video_example_100fish_1min	release_1	2	51	51
332	video_example_100fish_1min	release_1	2	69	69
333	video_example_100fish_1min	release_1	2	42	42
334	video_example_100fish_1min	release_1	2	63	63
335	video_example_100fish_1min	release_1	2	27	27
336	video_example_100fish_1min	release_1	2	55	55
337	video_example_100fish_1min	release_1	2	40	40
338	video_example_100fish_1min	release_1	2	90	90
339	video_example_100fish_1min	release_1	2	70	70
340	video_example_100fish_1min	release_1	2	1	1
341	video_example_100fish_1min	release_1	2	74	74
342	video_example_100fish_1min	release_1	2	64	64
343	video_example_100fish_1min	release_1	2	92	92
344	video_example_100fish_1min	release_1	2	61	61
345	video_example_100fish_1min	release_1	2	91	91
346	video_example_100fish_1min	release_1	2	0	0
347	video_example_100fish_1min	release_1	2	35	35
348	video_example_100fish_1min	release_1	2	44	44
349	video_example_100fish_1min	release_1	2	22	22
350	video_example_100fish_1min	release_1	2	86	86
351	guppy_8_t46_d1_20191207_102508	release_1	2	7	7
352	guppy_8_t46_d1_20191207_102508	release_1	2	0	0
353	guppy_8_t46_d1_20191207_102508	release_1	2	6	6
354	guppy_8_t46_d1_20191207_102508	release_1	2	1	1
355	guppy_8_t46_d1_20191207_102508	release_1	2	4	4
356	guppy_8_t46_d1_20191207_102508	release_1	2	5	5
357	guppy_8_t46_d1_20191207_102508	release_1	2	2	2
358	guppy_8_t46_d1_20191207_102508	release_1	2	3	3
359	guppy_8_t20_d1_20190512_115801	release_1	2	1	1
360	guppy_8_t20_d1_20190512_115801	release_1	2	2	2
361	guppy_8_t20_d1_20190512_115801	release_1	2	6	6
362	guppy_8_t20_d1_20190512_115801	release_1	2	3	3
363	guppy_8_t20_d1_20190512_115801	release_1	2	0	0
364	guppy_8_t20_d1_20190512_115801	release_1	2	5	5
365	guppy_8_t20_d1_20190512_115801	release_1	2	4	4
366	guppy_8_t20_d1_20190512_115801	release_1	2	7	7
367	flies_N59	release_1	2	45	45
368	flies_N59	release_1	2	22	22
369	flies_N59	release_1	2	13	13
370	flies_N59	release_1	2	12	12
371	flies_N59	release_1	2	17	17
372	flies_N59	release_1	2	11	11
373	flies_N59	release_1	2	15	15
374	flies_N59	release_1	2	50	50
375	flies_N59	release_1	2	48	48
376	flies_N59	release_1	2	14	14
377	flies_N59	release_1	2	31	31
378	flies_N59	release_1	2	46	46
379	flies_N59	release_1	2	27	27
380	flies_N59	release_1	2	10	10
381	flies_N59	release_1	2	9	9
382	flies_N59	release_1	2	16	16
383	flies_N59	release_1	2	8	8
384	flies_N59	release_1	2	44	44
385	flies_N59	release_1	2	7	7
386	flies_N59	release_1	2	28	28
387	flies_N59	release_1	2	53	53
388	flies_N59	release_1	2	29	29
389	flies_N59	release_1	2	23	23
390	flies_N59	release_1	2	49	49
391	flies_N59	release_1	2	39	39
392	flies_N59	release_1	2	33	33
393	flies_N59	release_1	2	24	24
394	flies_N59	release_1	2	20	20
395	flies_N59	release_1	2	36	36
396	flies_N59	release_1	2	21	21
397	flies_N59	release_1	2	58	58
398	flies_N59	release_1	2	43	43
399	flies_N59	release_1	2	6	6
400	flies_N59	release_1	2	40	40
401	flies_N59	release_1	2	51	51
402	flies_N59	release_1	2	26	26
403	flies_N59	release_1	2	25	25
404	flies_N59	release_1	2	5	5
405	flies_N59	release_1	2	32	32
406	flies_N59	release_1	2	4	4
407	flies_N59	release_1	2	3	3
408	flies_N59	release_1	2	41	41
409	flies_N59	release_1	2	38	38
410	flies_N59	release_1	2	2	2
411	flies_N59	release_1	2	54	54
412	flies_N59	release_1	2	35	35
413	flies_N59	release_1	2	47	47
414	flies_N59	release_1	2	57	57
415	flies_N59	release_1	2	1	1
416	flies_N59	release_1	2	37	37
417	flies_N59	release_1	2	55	55
418	flies_N59	release_1	2	30	30
419	flies_N59	release_1	2	42	42
420	flies_N59	release_1	2	34	34
421	flies_N59	release_1	2	19	19
422	flies_N59	release_1	2	0	0
423	flies_N59	release_1	2	18	18
424	flies_N59	release_1	2	52	52
425	flies_N59	release_1	2	56	56
426	group_1	release_1	3	8	8
427	group_1	release_1	3	1	1
428	group_1	release_1	3	5	5
429	group_1	release_1	3	3	3
430	group_1	release_1	3	6	6
431	group_1	release_1	3	7	7
432	group_1	release_1	3	9	9
433	group_1	release_1	3	2	2
434	group_1	release_1	3	4	4
435	group_1	release_1	3	0	0
436	group_2	release_1	3	8	8
437	group_2	release_1	3	4	4
438	group_2	release_1	3	9	9
439	group_2	release_1	3	7	7
440	group_2	release_1	3	6	6
441	group_2	release_1	3	1	1
442	group_2	release_1	3	0	0
443	group_2	release_1	3	3	3
444	group_2	release_1	3	5	5
445	group_2	release_1	3	2	2
446	group_3	release_1	3	8	8
447	group_3	release_1	3	4	4
448	group_3	release_1	3	1	1
449	group_3	release_1	3	9	9
450	group_3	release_1	3	7	7
451	group_3	release_1	3	3	3
452	group_3	release_1	3	6	6
453	group_3	release_1	3	0	0
454	group_3	release_1	3	2	2
455	group_3	release_1	3	5	5
456	guppy_8_t36_d15_20191212_085800	release_1	3	7	7
457	guppy_8_t36_d15_20191212_085800	release_1	3	1	1
458	guppy_8_t36_d15_20191212_085800	release_1	3	5	5
459	guppy_8_t36_d15_20191212_085800	release_1	3	0	0
460	guppy_8_t36_d15_20191212_085800	release_1	3	2	2
461	guppy_8_t36_d15_20191212_085800	release_1	3	4	4
462	guppy_8_t36_d15_20191212_085800	release_1	3	3	3
463	guppy_8_t36_d15_20191212_085800	release_1	3	6	6
464	video_example_100fish_1min	release_1	3	73	73
465	video_example_100fish_1min	release_1	3	34	34
466	video_example_100fish_1min	release_1	3	77	77
467	video_example_100fish_1min	release_1	3	88	88
468	video_example_100fish_1min	release_1	3	66	66
469	video_example_100fish_1min	release_1	3	96	96
470	video_example_100fish_1min	release_1	3	41	41
471	video_example_100fish_1min	release_1	3	18	18
472	video_example_100fish_1min	release_1	3	97	97
473	video_example_100fish_1min	release_1	3	36	36
474	video_example_100fish_1min	release_1	3	17	17
475	video_example_100fish_1min	release_1	3	16	16
476	video_example_100fish_1min	release_1	3	82	82
477	video_example_100fish_1min	release_1	3	15	15
478	video_example_100fish_1min	release_1	3	14	14
479	video_example_100fish_1min	release_1	3	83	83
480	video_example_100fish_1min	release_1	3	13	13
481	video_example_100fish_1min	release_1	3	21	21
482	video_example_100fish_1min	release_1	3	12	12
483	video_example_100fish_1min	release_1	3	11	11
484	video_example_100fish_1min	release_1	3	10	10
485	video_example_100fish_1min	release_1	3	45	45
486	video_example_100fish_1min	release_1	3	75	75
487	video_example_100fish_1min	release_1	3	71	71
488	video_example_100fish_1min	release_1	3	52	52
489	video_example_100fish_1min	release_1	3	93	93
490	video_example_100fish_1min	release_1	3	95	95
491	video_example_100fish_1min	release_1	3	26	26
492	video_example_100fish_1min	release_1	3	43	43
493	video_example_100fish_1min	release_1	3	65	65
494	video_example_100fish_1min	release_1	3	8	8
495	video_example_100fish_1min	release_1	3	46	46
496	video_example_100fish_1min	release_1	3	57	57
497	video_example_100fish_1min	release_1	3	20	20
498	video_example_100fish_1min	release_1	3	98	98
499	video_example_100fish_1min	release_1	3	32	32
500	video_example_100fish_1min	release_1	3	48	48
501	video_example_100fish_1min	release_1	3	78	78
502	video_example_100fish_1min	release_1	3	76	76
503	video_example_100fish_1min	release_1	3	9	9
504	video_example_100fish_1min	release_1	3	81	81
505	video_example_100fish_1min	release_1	3	87	87
506	video_example_100fish_1min	release_1	3	25	25
507	video_example_100fish_1min	release_1	3	29	29
508	video_example_100fish_1min	release_1	3	53	53
509	video_example_100fish_1min	release_1	3	85	85
510	video_example_100fish_1min	release_1	3	7	7
511	video_example_100fish_1min	release_1	3	62	62
512	video_example_100fish_1min	release_1	3	30	30
513	video_example_100fish_1min	release_1	3	59	59
514	video_example_100fish_1min	release_1	3	80	80
515	video_example_100fish_1min	release_1	3	84	84
516	video_example_100fish_1min	release_1	3	47	47
517	video_example_100fish_1min	release_1	3	99	99
518	video_example_100fish_1min	release_1	3	6	6
519	video_example_100fish_1min	release_1	3	54	54
520	video_example_100fish_1min	release_1	3	31	31
521	video_example_100fish_1min	release_1	3	38	38
522	video_example_100fish_1min	release_1	3	28	28
523	video_example_100fish_1min	release_1	3	5	5
524	video_example_100fish_1min	release_1	3	89	89
525	video_example_100fish_1min	release_1	3	33	33
526	video_example_100fish_1min	release_1	3	4	4
527	video_example_100fish_1min	release_1	3	3	3
528	video_example_100fish_1min	release_1	3	39	39
529	video_example_100fish_1min	release_1	3	2	2
530	video_example_100fish_1min	release_1	3	50	50
531	video_example_100fish_1min	release_1	3	37	37
532	video_example_100fish_1min	release_1	3	60	60
533	video_example_100fish_1min	release_1	3	58	58
534	video_example_100fish_1min	release_1	3	24	24
535	video_example_100fish_1min	release_1	3	79	79
536	video_example_100fish_1min	release_1	3	56	56
537	video_example_100fish_1min	release_1	3	68	68
538	video_example_100fish_1min	release_1	3	67	67
539	video_example_100fish_1min	release_1	3	94	94
540	video_example_100fish_1min	release_1	3	19	19
541	video_example_100fish_1min	release_1	3	23	23
542	video_example_100fish_1min	release_1	3	72	72
543	video_example_100fish_1min	release_1	3	49	49
544	video_example_100fish_1min	release_1	3	51	51
545	video_example_100fish_1min	release_1	3	69	69
546	video_example_100fish_1min	release_1	3	42	42
547	video_example_100fish_1min	release_1	3	63	63
548	video_example_100fish_1min	release_1	3	27	27
549	video_example_100fish_1min	release_1	3	55	55
550	video_example_100fish_1min	release_1	3	40	40
551	video_example_100fish_1min	release_1	3	90	90
552	video_example_100fish_1min	release_1	3	70	70
553	video_example_100fish_1min	release_1	3	1	1
554	video_example_100fish_1min	release_1	3	74	74
555	video_example_100fish_1min	release_1	3	64	64
556	video_example_100fish_1min	release_1	3	92	92
557	video_example_100fish_1min	release_1	3	61	61
558	video_example_100fish_1min	release_1	3	91	91
559	video_example_100fish_1min	release_1	3	0	0
560	video_example_100fish_1min	release_1	3	35	35
561	video_example_100fish_1min	release_1	3	44	44
562	video_example_100fish_1min	release_1	3	22	22
563	video_example_100fish_1min	release_1	3	86	86
564	guppy_8_t46_d1_20191207_102508	release_1	3	7	7
565	guppy_8_t46_d1_20191207_102508	release_1	3	2	2
566	guppy_8_t46_d1_20191207_102508	release_1	3	6	6
567	guppy_8_t46_d1_20191207_102508	release_1	3	0	0
568	guppy_8_t46_d1_20191207_102508	release_1	3	4	4
569	guppy_8_t46_d1_20191207_102508	release_1	3	5	5
570	guppy_8_t46_d1_20191207_102508	release_1	3	1	1
571	guppy_8_t46_d1_20191207_102508	release_1	3	3	3
572	guppy_8_t20_d1_20190512_115801	release_1	3	1	1
573	guppy_8_t20_d1_20190512_115801	release_1	3	2	2
574	guppy_8_t20_d1_20190512_115801	release_1	3	6	6
575	guppy_8_t20_d1_20190512_115801	release_1	3	3	3
576	guppy_8_t20_d1_20190512_115801	release_1	3	0	0
577	guppy_8_t20_d1_20190512_115801	release_1	3	5	5
578	guppy_8_t20_d1_20190512_115801	release_1	3	4	4
579	guppy_8_t20_d1_20190512_115801	release_1	3	7	7
580	flies_N59	release_1	3	43	43
581	flies_N59	release_1	3	22	22
582	flies_N59	release_1	3	13	13
583	flies_N59	release_1	3	12	12
584	flies_N59	release_1	3	17	17
585	flies_N59	release_1	3	11	11
586	flies_N59	release_1	3	15	15
587	flies_N59	release_1	3	48	48
588	flies_N59	release_1	3	46	46
589	flies_N59	release_1	3	14	14
590	flies_N59	release_1	3	29	29
591	flies_N59	release_1	3	44	44
592	flies_N59	release_1	3	58	58
593	flies_N59	release_1	3	10	10
594	flies_N59	release_1	3	9	9
595	flies_N59	release_1	3	16	16
596	flies_N59	release_1	3	8	8
597	flies_N59	release_1	3	42	42
598	flies_N59	release_1	3	7	7
599	flies_N59	release_1	3	27	27
600	flies_N59	release_1	3	51	51
601	flies_N59	release_1	3	28	28
602	flies_N59	release_1	3	23	23
603	flies_N59	release_1	3	47	47
604	flies_N59	release_1	3	38	38
605	flies_N59	release_1	3	31	31
606	flies_N59	release_1	3	24	24
607	flies_N59	release_1	3	20	20
608	flies_N59	release_1	3	34	34
609	flies_N59	release_1	3	21	21
610	flies_N59	release_1	3	56	56
611	flies_N59	release_1	3	57	57
612	flies_N59	release_1	3	6	6
613	flies_N59	release_1	3	39	39
614	flies_N59	release_1	3	49	49
615	flies_N59	release_1	3	26	26
616	flies_N59	release_1	3	25	25
617	flies_N59	release_1	3	5	5
618	flies_N59	release_1	3	30	30
619	flies_N59	release_1	3	4	4
620	flies_N59	release_1	3	3	3
621	flies_N59	release_1	3	40	40
622	flies_N59	release_1	3	35	35
623	flies_N59	release_1	3	2	2
624	flies_N59	release_1	3	52	52
625	flies_N59	release_1	3	33	33
626	flies_N59	release_1	3	45	45
627	flies_N59	release_1	3	55	55
628	flies_N59	release_1	3	1	1
629	flies_N59	release_1	3	36	36
630	flies_N59	release_1	3	53	53
631	flies_N59	release_1	3	37	37
632	flies_N59	release_1	3	41	41
633	flies_N59	release_1	3	32	32
634	flies_N59	release_1	3	19	19
635	flies_N59	release_1	3	0	0
636	flies_N59	release_1	3	18	18
637	flies_N59	release_1	3	50	50
638	flies_N59	release_1	3	54	54
639	group_1	release_2	1	8	8
640	group_1	release_2	1	1	1
641	group_1	release_2	1	5	5
642	group_1	release_2	1	3	3
643	group_1	release_2	1	6	6
644	group_1	release_2	1	7	7
645	group_1	release_2	1	9	9
646	group_1	release_2	1	2	2
647	group_1	release_2	1	4	4
648	group_1	release_2	1	0	0
649	group_2	release_2	1	8	8
650	group_2	release_2	1	4	4
651	group_2	release_2	1	9	9
652	group_2	release_2	1	7	7
653	group_2	release_2	1	6	6
654	group_2	release_2	1	1	1
655	group_2	release_2	1	0	0
656	group_2	release_2	1	3	3
657	group_2	release_2	1	5	5
658	group_2	release_2	1	2	2
659	group_3	release_2	1	8	8
660	group_3	release_2	1	4	4
661	group_3	release_2	1	1	1
662	group_3	release_2	1	9	9
663	group_3	release_2	1	7	7
664	group_3	release_2	1	3	3
665	group_3	release_2	1	6	6
666	group_3	release_2	1	0	0
667	group_3	release_2	1	2	2
668	group_3	release_2	1	5	5
669	guppy_8_t36_d15_20191212_085800	release_2	1	7	7
670	guppy_8_t36_d15_20191212_085800	release_2	1	1	1
671	guppy_8_t36_d15_20191212_085800	release_2	1	5	5
672	guppy_8_t36_d15_20191212_085800	release_2	1	0	0
673	guppy_8_t36_d15_20191212_085800	release_2	1	2	2
674	guppy_8_t36_d15_20191212_085800	release_2	1	4	4
675	guppy_8_t36_d15_20191212_085800	release_2	1	3	3
676	guppy_8_t36_d15_20191212_085800	release_2	1	6	6
677	video_example_100fish_1min	release_2	1	73	73
678	video_example_100fish_1min	release_2	1	34	34
679	video_example_100fish_1min	release_2	1	77	77
680	video_example_100fish_1min	release_2	1	88	88
681	video_example_100fish_1min	release_2	1	66	66
682	video_example_100fish_1min	release_2	1	97	97
683	video_example_100fish_1min	release_2	1	41	41
684	video_example_100fish_1min	release_2	1	18	18
685	video_example_100fish_1min	release_2	1	96	96
686	video_example_100fish_1min	release_2	1	36	36
687	video_example_100fish_1min	release_2	1	17	17
688	video_example_100fish_1min	release_2	1	16	16
689	video_example_100fish_1min	release_2	1	82	82
690	video_example_100fish_1min	release_2	1	15	15
691	video_example_100fish_1min	release_2	1	14	14
692	video_example_100fish_1min	release_2	1	83	83
693	video_example_100fish_1min	release_2	1	13	13
694	video_example_100fish_1min	release_2	1	21	21
695	video_example_100fish_1min	release_2	1	12	12
696	video_example_100fish_1min	release_2	1	11	11
697	video_example_100fish_1min	release_2	1	10	10
698	video_example_100fish_1min	release_2	1	45	45
699	video_example_100fish_1min	release_2	1	75	75
700	video_example_100fish_1min	release_2	1	71	71
701	video_example_100fish_1min	release_2	1	52	52
702	video_example_100fish_1min	release_2	1	93	93
703	video_example_100fish_1min	release_2	1	95	95
704	video_example_100fish_1min	release_2	1	26	26
705	video_example_100fish_1min	release_2	1	43	43
706	video_example_100fish_1min	release_2	1	65	65
707	video_example_100fish_1min	release_2	1	8	8
708	video_example_100fish_1min	release_2	1	46	46
709	video_example_100fish_1min	release_2	1	57	57
710	video_example_100fish_1min	release_2	1	20	20
711	video_example_100fish_1min	release_2	1	98	98
712	video_example_100fish_1min	release_2	1	32	32
713	video_example_100fish_1min	release_2	1	48	48
714	video_example_100fish_1min	release_2	1	78	78
715	video_example_100fish_1min	release_2	1	76	76
716	video_example_100fish_1min	release_2	1	9	9
717	video_example_100fish_1min	release_2	1	81	81
718	video_example_100fish_1min	release_2	1	87	87
719	video_example_100fish_1min	release_2	1	25	25
720	video_example_100fish_1min	release_2	1	29	29
721	video_example_100fish_1min	release_2	1	53	53
722	video_example_100fish_1min	release_2	1	85	85
723	video_example_100fish_1min	release_2	1	7	7
724	video_example_100fish_1min	release_2	1	62	62
725	video_example_100fish_1min	release_2	1	30	30
726	video_example_100fish_1min	release_2	1	59	59
727	video_example_100fish_1min	release_2	1	80	80
728	video_example_100fish_1min	release_2	1	84	84
729	video_example_100fish_1min	release_2	1	47	47
730	video_example_100fish_1min	release_2	1	99	99
731	video_example_100fish_1min	release_2	1	6	6
732	video_example_100fish_1min	release_2	1	54	54
733	video_example_100fish_1min	release_2	1	31	31
734	video_example_100fish_1min	release_2	1	38	38
735	video_example_100fish_1min	release_2	1	28	28
736	video_example_100fish_1min	release_2	1	5	5
737	video_example_100fish_1min	release_2	1	89	89
738	video_example_100fish_1min	release_2	1	33	33
739	video_example_100fish_1min	release_2	1	4	4
740	video_example_100fish_1min	release_2	1	3	3
741	video_example_100fish_1min	release_2	1	39	39
742	video_example_100fish_1min	release_2	1	2	2
743	video_example_100fish_1min	release_2	1	50	50
744	video_example_100fish_1min	release_2	1	37	37
745	video_example_100fish_1min	release_2	1	60	60
746	video_example_100fish_1min	release_2	1	58	58
747	video_example_100fish_1min	release_2	1	24	24
748	video_example_100fish_1min	release_2	1	79	79
749	video_example_100fish_1min	release_2	1	56	56
750	video_example_100fish_1min	release_2	1	68	68
751	video_example_100fish_1min	release_2	1	67	67
752	video_example_100fish_1min	release_2	1	94	94
753	video_example_100fish_1min	release_2	1	19	19
754	video_example_100fish_1min	release_2	1	23	23
755	video_example_100fish_1min	release_2	1	72	72
756	video_example_100fish_1min	release_2	1	49	49
757	video_example_100fish_1min	release_2	1	51	51
758	video_example_100fish_1min	release_2	1	69	69
759	video_example_100fish_1min	release_2	1	42	42
760	video_example_100fish_1min	release_2	1	63	63
761	video_example_100fish_1min	release_2	1	27	27
762	video_example_100fish_1min	release_2	1	55	55
763	video_example_100fish_1min	release_2	1	40	40
764	video_example_100fish_1min	release_2	1	90	90
765	video_example_100fish_1min	release_2	1	70	70
766	video_example_100fish_1min	release_2	1	1	1
767	video_example_100fish_1min	release_2	1	74	74
768	video_example_100fish_1min	release_2	1	64	64
769	video_example_100fish_1min	release_2	1	92	92
770	video_example_100fish_1min	release_2	1	61	61
771	video_example_100fish_1min	release_2	1	91	91
772	video_example_100fish_1min	release_2	1	0	0
773	video_example_100fish_1min	release_2	1	35	35
774	video_example_100fish_1min	release_2	1	44	44
775	video_example_100fish_1min	release_2	1	22	22
776	video_example_100fish_1min	release_2	1	86	86
777	guppy_8_t46_d1_20191207_102508	release_2	1	7	7
778	guppy_8_t46_d1_20191207_102508	release_2	1	2	2
779	guppy_8_t46_d1_20191207_102508	release_2	1	6	6
780	guppy_8_t46_d1_20191207_102508	release_2	1	0	0
781	guppy_8_t46_d1_20191207_102508	release_2	1	4	4
782	guppy_8_t46_d1_20191207_102508	release_2	1	5	5
783	guppy_8_t46_d1_20191207_102508	release_2	1	1	1
784	guppy_8_t46_d1_20191207_102508	release_2	1	3	3
785	guppy_8_t20_d1_20190512_115801	release_2	1	1	1
786	guppy_8_t20_d1_20190512_115801	release_2	1	2	2
787	guppy_8_t20_d1_20190512_115801	release_2	1	6	6
788	guppy_8_t20_d1_20190512_115801	release_2	1	3	3
789	guppy_8_t20_d1_20190512_115801	release_2	1	0	0
790	guppy_8_t20_d1_20190512_115801	release_2	1	5	5
791	guppy_8_t20_d1_20190512_115801	release_2	1	4	4
792	guppy_8_t20_d1_20190512_115801	release_2	1	7	7
793	flies_N59	release_2	1	52	52
794	flies_N59	release_2	1	25	25
795	flies_N59	release_2	1	13	13
796	flies_N59	release_2	1	12	12
797	flies_N59	release_2	1	17	17
798	flies_N59	release_2	1	11	11
799	flies_N59	release_2	1	15	15
800	flies_N59	release_2	1	58	58
801	flies_N59	release_2	1	56	56
802	flies_N59	release_2	1	14	14
803	flies_N59	release_2	1	33	33
804	flies_N59	release_2	1	53	53
805	flies_N59	release_2	1	30	30
806	flies_N59	release_2	1	10	10
807	flies_N59	release_2	1	9	9
808	flies_N59	release_2	1	16	16
809	flies_N59	release_2	1	8	8
810	flies_N59	release_2	1	51	51
811	flies_N59	release_2	1	7	7
812	flies_N59	release_2	1	31	31
813	flies_N59	release_2	1	47	47
814	flies_N59	release_2	1	32	32
815	flies_N59	release_2	1	26	26
816	flies_N59	release_2	1	57	57
817	flies_N59	release_2	1	42	42
818	flies_N59	release_2	1	35	35
819	flies_N59	release_2	1	27	27
820	flies_N59	release_2	1	20	20
821	flies_N59	release_2	1	38	38
822	flies_N59	release_2	1	21	21
823	flies_N59	release_2	1	46	46
824	flies_N59	release_2	1	49	49
825	flies_N59	release_2	1	6	6
826	flies_N59	release_2	1	44	44
827	flies_N59	release_2	1	24	24
828	flies_N59	release_2	1	29	29
829	flies_N59	release_2	1	28	28
830	flies_N59	release_2	1	5	5
831	flies_N59	release_2	1	34	34
832	flies_N59	release_2	1	23	23
833	flies_N59	release_2	1	4	4
834	flies_N59	release_2	1	45	45
835	flies_N59	release_2	1	39	39
836	flies_N59	release_2	1	3	3
837	flies_N59	release_2	1	2	2
838	flies_N59	release_2	1	37	37
839	flies_N59	release_2	1	55	55
840	flies_N59	release_2	1	43	43
841	flies_N59	release_2	1	1	1
842	flies_N59	release_2	1	40	40
843	flies_N59	release_2	1	22	22
844	flies_N59	release_2	1	41	41
845	flies_N59	release_2	1	48	48
846	flies_N59	release_2	1	36	36
847	flies_N59	release_2	1	19	19
848	flies_N59	release_2	1	0	0
849	flies_N59	release_2	1	18	18
850	flies_N59	release_2	1	54	54
851	flies_N59	release_2	1	50	50
852	group_1	release_2	2	8	8
853	group_1	release_2	2	1	1
854	group_1	release_2	2	5	5
855	group_1	release_2	2	3	3
856	group_1	release_2	2	6	6
857	group_1	release_2	2	7	7
858	group_1	release_2	2	9	9
859	group_1	release_2	2	2	2
860	group_1	release_2	2	4	4
861	group_1	release_2	2	0	0
862	group_2	release_2	2	8	8
863	group_2	release_2	2	4	4
864	group_2	release_2	2	9	9
865	group_2	release_2	2	7	7
866	group_2	release_2	2	6	6
867	group_2	release_2	2	1	1
868	group_2	release_2	2	0	0
869	group_2	release_2	2	3	3
870	group_2	release_2	2	5	5
871	group_2	release_2	2	2	2
872	group_3	release_2	2	8	8
873	group_3	release_2	2	4	4
874	group_3	release_2	2	1	1
875	group_3	release_2	2	9	9
876	group_3	release_2	2	7	7
877	group_3	release_2	2	3	3
878	group_3	release_2	2	6	6
879	group_3	release_2	2	0	0
880	group_3	release_2	2	2	2
881	group_3	release_2	2	5	5
882	guppy_8_t36_d15_20191212_085800	release_2	2	7	7
883	guppy_8_t36_d15_20191212_085800	release_2	2	1	1
884	guppy_8_t36_d15_20191212_085800	release_2	2	5	5
885	guppy_8_t36_d15_20191212_085800	release_2	2	0	0
886	guppy_8_t36_d15_20191212_085800	release_2	2	2	2
887	guppy_8_t36_d15_20191212_085800	release_2	2	4	4
888	guppy_8_t36_d15_20191212_085800	release_2	2	3	3
889	guppy_8_t36_d15_20191212_085800	release_2	2	6	6
890	video_example_100fish_1min	release_2	2	73	73
891	video_example_100fish_1min	release_2	2	34	34
892	video_example_100fish_1min	release_2	2	77	77
893	video_example_100fish_1min	release_2	2	88	88
894	video_example_100fish_1min	release_2	2	66	66
895	video_example_100fish_1min	release_2	2	96	96
896	video_example_100fish_1min	release_2	2	41	41
897	video_example_100fish_1min	release_2	2	18	18
898	video_example_100fish_1min	release_2	2	97	97
899	video_example_100fish_1min	release_2	2	36	36
900	video_example_100fish_1min	release_2	2	17	17
901	video_example_100fish_1min	release_2	2	16	16
902	video_example_100fish_1min	release_2	2	82	82
903	video_example_100fish_1min	release_2	2	15	15
904	video_example_100fish_1min	release_2	2	14	14
905	video_example_100fish_1min	release_2	2	83	83
906	video_example_100fish_1min	release_2	2	13	13
907	video_example_100fish_1min	release_2	2	21	21
908	video_example_100fish_1min	release_2	2	12	12
909	video_example_100fish_1min	release_2	2	11	11
910	video_example_100fish_1min	release_2	2	10	10
911	video_example_100fish_1min	release_2	2	45	45
912	video_example_100fish_1min	release_2	2	75	75
913	video_example_100fish_1min	release_2	2	71	71
914	video_example_100fish_1min	release_2	2	52	52
915	video_example_100fish_1min	release_2	2	93	93
916	video_example_100fish_1min	release_2	2	95	95
917	video_example_100fish_1min	release_2	2	26	26
918	video_example_100fish_1min	release_2	2	43	43
919	video_example_100fish_1min	release_2	2	65	65
920	video_example_100fish_1min	release_2	2	8	8
921	video_example_100fish_1min	release_2	2	46	46
922	video_example_100fish_1min	release_2	2	57	57
923	video_example_100fish_1min	release_2	2	20	20
924	video_example_100fish_1min	release_2	2	98	98
925	video_example_100fish_1min	release_2	2	32	32
926	video_example_100fish_1min	release_2	2	48	48
927	video_example_100fish_1min	release_2	2	78	78
928	video_example_100fish_1min	release_2	2	76	76
929	video_example_100fish_1min	release_2	2	9	9
930	video_example_100fish_1min	release_2	2	81	81
931	video_example_100fish_1min	release_2	2	87	87
932	video_example_100fish_1min	release_2	2	25	25
933	video_example_100fish_1min	release_2	2	29	29
934	video_example_100fish_1min	release_2	2	53	53
935	video_example_100fish_1min	release_2	2	85	85
936	video_example_100fish_1min	release_2	2	7	7
937	video_example_100fish_1min	release_2	2	62	62
938	video_example_100fish_1min	release_2	2	30	30
939	video_example_100fish_1min	release_2	2	59	59
940	video_example_100fish_1min	release_2	2	80	80
941	video_example_100fish_1min	release_2	2	84	84
942	video_example_100fish_1min	release_2	2	47	47
943	video_example_100fish_1min	release_2	2	99	99
944	video_example_100fish_1min	release_2	2	6	6
945	video_example_100fish_1min	release_2	2	54	54
946	video_example_100fish_1min	release_2	2	31	31
947	video_example_100fish_1min	release_2	2	38	38
948	video_example_100fish_1min	release_2	2	28	28
949	video_example_100fish_1min	release_2	2	5	5
950	video_example_100fish_1min	release_2	2	89	89
951	video_example_100fish_1min	release_2	2	33	33
952	video_example_100fish_1min	release_2	2	4	4
953	video_example_100fish_1min	release_2	2	3	3
954	video_example_100fish_1min	release_2	2	39	39
955	video_example_100fish_1min	release_2	2	2	2
956	video_example_100fish_1min	release_2	2	50	50
957	video_example_100fish_1min	release_2	2	37	37
958	video_example_100fish_1min	release_2	2	60	60
959	video_example_100fish_1min	release_2	2	58	58
960	video_example_100fish_1min	release_2	2	24	24
961	video_example_100fish_1min	release_2	2	79	79
962	video_example_100fish_1min	release_2	2	56	56
963	video_example_100fish_1min	release_2	2	68	68
964	video_example_100fish_1min	release_2	2	67	67
965	video_example_100fish_1min	release_2	2	94	94
966	video_example_100fish_1min	release_2	2	19	19
967	video_example_100fish_1min	release_2	2	23	23
968	video_example_100fish_1min	release_2	2	72	72
969	video_example_100fish_1min	release_2	2	49	49
970	video_example_100fish_1min	release_2	2	51	51
971	video_example_100fish_1min	release_2	2	69	69
972	video_example_100fish_1min	release_2	2	42	42
973	video_example_100fish_1min	release_2	2	63	63
974	video_example_100fish_1min	release_2	2	27	27
975	video_example_100fish_1min	release_2	2	55	55
976	video_example_100fish_1min	release_2	2	40	40
977	video_example_100fish_1min	release_2	2	90	90
978	video_example_100fish_1min	release_2	2	70	70
979	video_example_100fish_1min	release_2	2	1	1
980	video_example_100fish_1min	release_2	2	74	74
981	video_example_100fish_1min	release_2	2	64	64
982	video_example_100fish_1min	release_2	2	92	92
983	video_example_100fish_1min	release_2	2	61	61
984	video_example_100fish_1min	release_2	2	91	91
985	video_example_100fish_1min	release_2	2	0	0
986	video_example_100fish_1min	release_2	2	35	35
987	video_example_100fish_1min	release_2	2	44	44
988	video_example_100fish_1min	release_2	2	22	22
989	video_example_100fish_1min	release_2	2	86	86
990	guppy_8_t46_d1_20191207_102508	release_2	2	7	7
991	guppy_8_t46_d1_20191207_102508	release_2	2	0	0
992	guppy_8_t46_d1_20191207_102508	release_2	2	6	6
993	guppy_8_t46_d1_20191207_102508	release_2	2	1	1
994	guppy_8_t46_d1_20191207_102508	release_2	2	4	4
995	guppy_8_t46_d1_20191207_102508	release_2	2	5	5
996	guppy_8_t46_d1_20191207_102508	release_2	2	2	2
997	guppy_8_t46_d1_20191207_102508	release_2	2	3	3
998	guppy_8_t20_d1_20190512_115801	release_2	2	1	1
999	guppy_8_t20_d1_20190512_115801	release_2	2	2	2
1000	guppy_8_t20_d1_20190512_115801	release_2	2	6	6
1001	guppy_8_t20_d1_20190512_115801	release_2	2	3	3
1002	guppy_8_t20_d1_20190512_115801	release_2	2	0	0
1003	guppy_8_t20_d1_20190512_115801	release_2	2	5	5
1004	guppy_8_t20_d1_20190512_115801	release_2	2	4	4
1005	guppy_8_t20_d1_20190512_115801	release_2	2	7	7
1006	flies_N59	release_2	2	45	45
1007	flies_N59	release_2	2	22	22
1008	flies_N59	release_2	2	13	13
1009	flies_N59	release_2	2	12	12
1010	flies_N59	release_2	2	17	17
1011	flies_N59	release_2	2	11	11
1012	flies_N59	release_2	2	15	15
1013	flies_N59	release_2	2	50	50
1014	flies_N59	release_2	2	48	48
1015	flies_N59	release_2	2	14	14
1016	flies_N59	release_2	2	31	31
1017	flies_N59	release_2	2	46	46
1018	flies_N59	release_2	2	27	27
1019	flies_N59	release_2	2	10	10
1020	flies_N59	release_2	2	9	9
1021	flies_N59	release_2	2	16	16
1022	flies_N59	release_2	2	8	8
1023	flies_N59	release_2	2	44	44
1024	flies_N59	release_2	2	7	7
1025	flies_N59	release_2	2	28	28
1026	flies_N59	release_2	2	53	53
1027	flies_N59	release_2	2	29	29
1028	flies_N59	release_2	2	23	23
1029	flies_N59	release_2	2	49	49
1030	flies_N59	release_2	2	39	39
1031	flies_N59	release_2	2	33	33
1032	flies_N59	release_2	2	24	24
1033	flies_N59	release_2	2	20	20
1034	flies_N59	release_2	2	36	36
1035	flies_N59	release_2	2	21	21
1036	flies_N59	release_2	2	58	58
1037	flies_N59	release_2	2	43	43
1038	flies_N59	release_2	2	6	6
1039	flies_N59	release_2	2	40	40
1040	flies_N59	release_2	2	51	51
1041	flies_N59	release_2	2	26	26
1042	flies_N59	release_2	2	25	25
1043	flies_N59	release_2	2	5	5
1044	flies_N59	release_2	2	32	32
1045	flies_N59	release_2	2	4	4
1046	flies_N59	release_2	2	3	3
1047	flies_N59	release_2	2	41	41
1048	flies_N59	release_2	2	38	38
1049	flies_N59	release_2	2	2	2
1050	flies_N59	release_2	2	54	54
1051	flies_N59	release_2	2	35	35
1052	flies_N59	release_2	2	47	47
1053	flies_N59	release_2	2	57	57
1054	flies_N59	release_2	2	1	1
1055	flies_N59	release_2	2	37	37
1056	flies_N59	release_2	2	55	55
1057	flies_N59	release_2	2	30	30
1058	flies_N59	release_2	2	42	42
1059	flies_N59	release_2	2	34	34
1060	flies_N59	release_2	2	19	19
1061	flies_N59	release_2	2	0	0
1062	flies_N59	release_2	2	18	18
1063	flies_N59	release_2	2	52	52
1064	flies_N59	release_2	2	56	56
1065	group_1	release_2	3	8	8
1066	group_1	release_2	3	1	1
1067	group_1	release_2	3	5	5
1068	group_1	release_2	3	3	3
1069	group_1	release_2	3	6	6
1070	group_1	release_2	3	7	7
1071	group_1	release_2	3	9	9
1072	group_1	release_2	3	2	2
1073	group_1	release_2	3	4	4
1074	group_1	release_2	3	0	0
1075	group_2	release_2	3	8	8
1076	group_2	release_2	3	4	4
1077	group_2	release_2	3	9	9
1078	group_2	release_2	3	7	7
1079	group_2	release_2	3	6	6
1080	group_2	release_2	3	1	1
1081	group_2	release_2	3	0	0
1082	group_2	release_2	3	3	3
1083	group_2	release_2	3	5	5
1084	group_2	release_2	3	2	2
1085	group_3	release_2	3	8	8
1086	group_3	release_2	3	4	4
1087	group_3	release_2	3	1	1
1088	group_3	release_2	3	9	9
1089	group_3	release_2	3	7	7
1090	group_3	release_2	3	3	3
1091	group_3	release_2	3	6	6
1092	group_3	release_2	3	0	0
1093	group_3	release_2	3	2	2
1094	group_3	release_2	3	5	5
1095	guppy_8_t36_d15_20191212_085800	release_2	3	7	7
1096	guppy_8_t36_d15_20191212_085800	release_2	3	1	1
1097	guppy_8_t36_d15_20191212_085800	release_2	3	5	5
1098	guppy_8_t36_d15_20191212_085800	release_2	3	0	0
1099	guppy_8_t36_d15_20191212_085800	release_2	3	2	2
1100	guppy_8_t36_d15_20191212_085800	release_2	3	4	4
1101	guppy_8_t36_d15_20191212_085800	release_2	3	3	3
1102	guppy_8_t36_d15_20191212_085800	release_2	3	6	6
1103	video_example_100fish_1min	release_2	3	73	73
1104	video_example_100fish_1min	release_2	3	34	34
1105	video_example_100fish_1min	release_2	3	77	77
1106	video_example_100fish_1min	release_2	3	88	88
1107	video_example_100fish_1min	release_2	3	66	66
1108	video_example_100fish_1min	release_2	3	96	96
1109	video_example_100fish_1min	release_2	3	41	41
1110	video_example_100fish_1min	release_2	3	18	18
1111	video_example_100fish_1min	release_2	3	97	97
1112	video_example_100fish_1min	release_2	3	36	36
1113	video_example_100fish_1min	release_2	3	17	17
1114	video_example_100fish_1min	release_2	3	16	16
1115	video_example_100fish_1min	release_2	3	82	82
1116	video_example_100fish_1min	release_2	3	15	15
1117	video_example_100fish_1min	release_2	3	14	14
1118	video_example_100fish_1min	release_2	3	83	83
1119	video_example_100fish_1min	release_2	3	13	13
1120	video_example_100fish_1min	release_2	3	21	21
1121	video_example_100fish_1min	release_2	3	12	12
1122	video_example_100fish_1min	release_2	3	11	11
1123	video_example_100fish_1min	release_2	3	10	10
1124	video_example_100fish_1min	release_2	3	45	45
1125	video_example_100fish_1min	release_2	3	75	75
1126	video_example_100fish_1min	release_2	3	71	71
1127	video_example_100fish_1min	release_2	3	52	52
1128	video_example_100fish_1min	release_2	3	93	93
1129	video_example_100fish_1min	release_2	3	95	95
1130	video_example_100fish_1min	release_2	3	26	26
1131	video_example_100fish_1min	release_2	3	43	43
1132	video_example_100fish_1min	release_2	3	65	65
1133	video_example_100fish_1min	release_2	3	8	8
1134	video_example_100fish_1min	release_2	3	46	46
1135	video_example_100fish_1min	release_2	3	57	57
1136	video_example_100fish_1min	release_2	3	20	20
1137	video_example_100fish_1min	release_2	3	98	98
1138	video_example_100fish_1min	release_2	3	32	32
1139	video_example_100fish_1min	release_2	3	48	48
1140	video_example_100fish_1min	release_2	3	78	78
1141	video_example_100fish_1min	release_2	3	76	76
1142	video_example_100fish_1min	release_2	3	9	9
1143	video_example_100fish_1min	release_2	3	81	81
1144	video_example_100fish_1min	release_2	3	87	87
1145	video_example_100fish_1min	release_2	3	25	25
1146	video_example_100fish_1min	release_2	3	29	29
1147	video_example_100fish_1min	release_2	3	53	53
1148	video_example_100fish_1min	release_2	3	85	85
1149	video_example_100fish_1min	release_2	3	7	7
1150	video_example_100fish_1min	release_2	3	62	62
1151	video_example_100fish_1min	release_2	3	30	30
1152	video_example_100fish_1min	release_2	3	59	59
1153	video_example_100fish_1min	release_2	3	80	80
1154	video_example_100fish_1min	release_2	3	84	84
1155	video_example_100fish_1min	release_2	3	47	47
1156	video_example_100fish_1min	release_2	3	99	99
1157	video_example_100fish_1min	release_2	3	6	6
1158	video_example_100fish_1min	release_2	3	54	54
1159	video_example_100fish_1min	release_2	3	31	31
1160	video_example_100fish_1min	release_2	3	38	38
1161	video_example_100fish_1min	release_2	3	28	28
1162	video_example_100fish_1min	release_2	3	5	5
1163	video_example_100fish_1min	release_2	3	89	89
1164	video_example_100fish_1min	release_2	3	33	33
1165	video_example_100fish_1min	release_2	3	4	4
1166	video_example_100fish_1min	release_2	3	3	3
1167	video_example_100fish_1min	release_2	3	39	39
1168	video_example_100fish_1min	release_2	3	2	2
1169	video_example_100fish_1min	release_2	3	50	50
1170	video_example_100fish_1min	release_2	3	37	37
1171	video_example_100fish_1min	release_2	3	60	60
1172	video_example_100fish_1min	release_2	3	58	58
1173	video_example_100fish_1min	release_2	3	24	24
1174	video_example_100fish_1min	release_2	3	79	79
1175	video_example_100fish_1min	release_2	3	56	56
1176	video_example_100fish_1min	release_2	3	68	68
1177	video_example_100fish_1min	release_2	3	67	67
1178	video_example_100fish_1min	release_2	3	94	94
1179	video_example_100fish_1min	release_2	3	19	19
1180	video_example_100fish_1min	release_2	3	23	23
1181	video_example_100fish_1min	release_2	3	72	72
1182	video_example_100fish_1min	release_2	3	49	49
1183	video_example_100fish_1min	release_2	3	51	51
1184	video_example_100fish_1min	release_2	3	69	69
1185	video_example_100fish_1min	release_2	3	42	42
1186	video_example_100fish_1min	release_2	3	63	63
1187	video_example_100fish_1min	release_2	3	27	27
1188	video_example_100fish_1min	release_2	3	55	55
1189	video_example_100fish_1min	release_2	3	40	40
1190	video_example_100fish_1min	release_2	3	90	90
1191	video_example_100fish_1min	release_2	3	70	70
1192	video_example_100fish_1min	release_2	3	1	1
1193	video_example_100fish_1min	release_2	3	74	74
1194	video_example_100fish_1min	release_2	3	64	64
1195	video_example_100fish_1min	release_2	3	92	92
1196	video_example_100fish_1min	release_2	3	61	61
1197	video_example_100fish_1min	release_2	3	91	91
1198	video_example_100fish_1min	release_2	3	0	0
1199	video_example_100fish_1min	release_2	3	35	35
1200	video_example_100fish_1min	release_2	3	44	44
1201	video_example_100fish_1min	release_2	3	22	22
1202	video_example_100fish_1min	release_2	3	86	86
1203	guppy_8_t46_d1_20191207_102508	release_2	3	7	7
1204	guppy_8_t46_d1_20191207_102508	release_2	3	2	2
1205	guppy_8_t46_d1_20191207_102508	release_2	3	6	6
1206	guppy_8_t46_d1_20191207_102508	release_2	3	0	0
1207	guppy_8_t46_d1_20191207_102508	release_2	3	4	4
1208	guppy_8_t46_d1_20191207_102508	release_2	3	5	5
1209	guppy_8_t46_d1_20191207_102508	release_2	3	1	1
1210	guppy_8_t46_d1_20191207_102508	release_2	3	3	3
1211	guppy_8_t20_d1_20190512_115801	release_2	3	1	1
1212	guppy_8_t20_d1_20190512_115801	release_2	3	2	2
1213	guppy_8_t20_d1_20190512_115801	release_2	3	6	6
1214	guppy_8_t20_d1_20190512_115801	release_2	3	3	3
1215	guppy_8_t20_d1_20190512_115801	release_2	3	0	0
1216	guppy_8_t20_d1_20190512_115801	release_2	3	5	5
1217	guppy_8_t20_d1_20190512_115801	release_2	3	4	4
1218	guppy_8_t20_d1_20190512_115801	release_2	3	7	7
1219	flies_N59	release_2	3	43	43
1220	flies_N59	release_2	3	22	22
1221	flies_N59	release_2	3	13	13
1222	flies_N59	release_2	3	12	12
1223	flies_N59	release_2	3	17	17
1224	flies_N59	release_2	3	11	11
1225	flies_N59	release_2	3	15	15
1226	flies_N59	release_2	3	48	48
1227	flies_N59	release_2	3	46	46
1228	flies_N59	release_2	3	14	14
1229	flies_N59	release_2	3	29	29
1230	flies_N59	release_2	3	44	44
1231	flies_N59	release_2	3	58	58
1232	flies_N59	release_2	3	10	10
1233	flies_N59	release_2	3	9	9
1234	flies_N59	release_2	3	16	16
1235	flies_N59	release_2	3	8	8
1236	flies_N59	release_2	3	42	42
1237	flies_N59	release_2	3	7	7
1238	flies_N59	release_2	3	27	27
1239	flies_N59	release_2	3	51	51
1240	flies_N59	release_2	3	28	28
1241	flies_N59	release_2	3	23	23
1242	flies_N59	release_2	3	47	47
1243	flies_N59	release_2	3	38	38
1244	flies_N59	release_2	3	31	31
1245	flies_N59	release_2	3	24	24
1246	flies_N59	release_2	3	20	20
1247	flies_N59	release_2	3	34	34
1248	flies_N59	release_2	3	21	21
1249	flies_N59	release_2	3	56	56
1250	flies_N59	release_2	3	57	57
1251	flies_N59	release_2	3	6	6
1252	flies_N59	release_2	3	39	39
1253	flies_N59	release_2	3	49	49
1254	flies_N59	release_2	3	26	26
1255	flies_N59	release_2	3	25	25
1256	flies_N59	release_2	3	5	5
1257	flies_N59	release_2	3	30	30
1258	flies_N59	release_2	3	4	4
1259	flies_N59	release_2	3	3	3
1260	flies_N59	release_2	3	40	40
1261	flies_N59	release_2	3	35	35
1262	flies_N59	release_2	3	2	2
1263	flies_N59	release_2	3	52	52
1264	flies_N59	release_2	3	33	33
1265	flies_N59	release_2	3	45	45
1266	flies_N59	release_2	3	55	55
1267	flies_N59	release_2	3	1	1
1268	flies_N59	release_2	3	36	36
1269	flies_N59	release_2	3	53	53
1270	flies_N59	release_2	3	37	37
1271	flies_N59	release_2	3	41	41
1272	flies_N59	release_2	3	32	32
1273	flies_N59	release_2	3	19	19
1274	flies_N59	release_2	3	0	0
1275	flies_N59	release_2	3	18	18
1276	flies_N59	release_2	3	50	50
1277	flies_N59	release_2	3	54	54
1278	group_1	release_3	1	8	8
1279	group_1	release_3	1	1	1
1280	group_1	release_3	1	5	5
1281	group_1	release_3	1	3	3
1282	group_1	release_3	1	6	6
1283	group_1	release_3	1	7	7
1284	group_1	release_3	1	9	9
1285	group_1	release_3	1	2	2
1286	group_1	release_3	1	4	4
1287	group_1	release_3	1	0	0
1288	group_2	release_3	1	8	8
1289	group_2	release_3	1	4	4
1290	group_2	release_3	1	9	9
1291	group_2	release_3	1	7	7
1292	group_2	release_3	1	6	6
1293	group_2	release_3	1	1	1
1294	group_2	release_3	1	0	0
1295	group_2	release_3	1	3	3
1296	group_2	release_3	1	5	5
1297	group_2	release_3	1	2	2
1298	group_3	release_3	1	8	8
1299	group_3	release_3	1	4	4
1300	group_3	release_3	1	1	1
1301	group_3	release_3	1	9	9
1302	group_3	release_3	1	7	7
1303	group_3	release_3	1	3	3
1304	group_3	release_3	1	6	6
1305	group_3	release_3	1	0	0
1306	group_3	release_3	1	2	2
1307	group_3	release_3	1	5	5
1308	guppy_8_t36_d15_20191212_085800	release_3	1	7	7
1309	guppy_8_t36_d15_20191212_085800	release_3	1	1	1
1310	guppy_8_t36_d15_20191212_085800	release_3	1	5	5
1311	guppy_8_t36_d15_20191212_085800	release_3	1	0	0
1312	guppy_8_t36_d15_20191212_085800	release_3	1	2	2
1313	guppy_8_t36_d15_20191212_085800	release_3	1	4	4
1314	guppy_8_t36_d15_20191212_085800	release_3	1	3	3
1315	guppy_8_t36_d15_20191212_085800	release_3	1	6	6
1316	video_example_100fish_1min	release_3	1	73	73
1317	video_example_100fish_1min	release_3	1	34	34
1318	video_example_100fish_1min	release_3	1	77	77
1319	video_example_100fish_1min	release_3	1	88	88
1320	video_example_100fish_1min	release_3	1	66	66
1321	video_example_100fish_1min	release_3	1	97	97
1322	video_example_100fish_1min	release_3	1	41	41
1323	video_example_100fish_1min	release_3	1	18	18
1324	video_example_100fish_1min	release_3	1	96	96
1325	video_example_100fish_1min	release_3	1	36	36
1326	video_example_100fish_1min	release_3	1	17	17
1327	video_example_100fish_1min	release_3	1	16	16
1328	video_example_100fish_1min	release_3	1	82	82
1329	video_example_100fish_1min	release_3	1	15	15
1330	video_example_100fish_1min	release_3	1	14	14
1331	video_example_100fish_1min	release_3	1	83	83
1332	video_example_100fish_1min	release_3	1	13	13
1333	video_example_100fish_1min	release_3	1	21	21
1334	video_example_100fish_1min	release_3	1	12	12
1335	video_example_100fish_1min	release_3	1	11	11
1336	video_example_100fish_1min	release_3	1	10	10
1337	video_example_100fish_1min	release_3	1	45	45
1338	video_example_100fish_1min	release_3	1	75	75
1339	video_example_100fish_1min	release_3	1	71	71
1340	video_example_100fish_1min	release_3	1	52	52
1341	video_example_100fish_1min	release_3	1	93	93
1342	video_example_100fish_1min	release_3	1	95	95
1343	video_example_100fish_1min	release_3	1	26	26
1344	video_example_100fish_1min	release_3	1	43	43
1345	video_example_100fish_1min	release_3	1	65	65
1346	video_example_100fish_1min	release_3	1	8	8
1347	video_example_100fish_1min	release_3	1	46	46
1348	video_example_100fish_1min	release_3	1	57	57
1349	video_example_100fish_1min	release_3	1	20	20
1350	video_example_100fish_1min	release_3	1	98	98
1351	video_example_100fish_1min	release_3	1	32	32
1352	video_example_100fish_1min	release_3	1	48	48
1353	video_example_100fish_1min	release_3	1	78	78
1354	video_example_100fish_1min	release_3	1	76	76
1355	video_example_100fish_1min	release_3	1	9	9
1356	video_example_100fish_1min	release_3	1	81	81
1357	video_example_100fish_1min	release_3	1	87	87
1358	video_example_100fish_1min	release_3	1	25	25
1359	video_example_100fish_1min	release_3	1	29	29
1360	video_example_100fish_1min	release_3	1	53	53
1361	video_example_100fish_1min	release_3	1	85	85
1362	video_example_100fish_1min	release_3	1	7	7
1363	video_example_100fish_1min	release_3	1	62	62
1364	video_example_100fish_1min	release_3	1	30	30
1365	video_example_100fish_1min	release_3	1	59	59
1366	video_example_100fish_1min	release_3	1	80	80
1367	video_example_100fish_1min	release_3	1	84	84
1368	video_example_100fish_1min	release_3	1	47	47
1369	video_example_100fish_1min	release_3	1	99	99
1370	video_example_100fish_1min	release_3	1	6	6
1371	video_example_100fish_1min	release_3	1	54	54
1372	video_example_100fish_1min	release_3	1	31	31
1373	video_example_100fish_1min	release_3	1	38	38
1374	video_example_100fish_1min	release_3	1	28	28
1375	video_example_100fish_1min	release_3	1	5	5
1376	video_example_100fish_1min	release_3	1	89	89
1377	video_example_100fish_1min	release_3	1	33	33
1378	video_example_100fish_1min	release_3	1	4	4
1379	video_example_100fish_1min	release_3	1	3	3
1380	video_example_100fish_1min	release_3	1	39	39
1381	video_example_100fish_1min	release_3	1	2	2
1382	video_example_100fish_1min	release_3	1	50	50
1383	video_example_100fish_1min	release_3	1	37	37
1384	video_example_100fish_1min	release_3	1	60	60
1385	video_example_100fish_1min	release_3	1	58	58
1386	video_example_100fish_1min	release_3	1	24	24
1387	video_example_100fish_1min	release_3	1	79	79
1388	video_example_100fish_1min	release_3	1	56	56
1389	video_example_100fish_1min	release_3	1	68	68
1390	video_example_100fish_1min	release_3	1	67	67
1391	video_example_100fish_1min	release_3	1	94	94
1392	video_example_100fish_1min	release_3	1	19	19
1393	video_example_100fish_1min	release_3	1	23	23
1394	video_example_100fish_1min	release_3	1	72	72
1395	video_example_100fish_1min	release_3	1	49	49
1396	video_example_100fish_1min	release_3	1	51	51
1397	video_example_100fish_1min	release_3	1	69	69
1398	video_example_100fish_1min	release_3	1	42	42
1399	video_example_100fish_1min	release_3	1	63	63
1400	video_example_100fish_1min	release_3	1	27	27
1401	video_example_100fish_1min	release_3	1	55	55
1402	video_example_100fish_1min	release_3	1	40	40
1403	video_example_100fish_1min	release_3	1	90	90
1404	video_example_100fish_1min	release_3	1	70	70
1405	video_example_100fish_1min	release_3	1	1	1
1406	video_example_100fish_1min	release_3	1	74	74
1407	video_example_100fish_1min	release_3	1	64	64
1408	video_example_100fish_1min	release_3	1	92	92
1409	video_example_100fish_1min	release_3	1	61	61
1410	video_example_100fish_1min	release_3	1	91	91
1411	video_example_100fish_1min	release_3	1	0	0
1412	video_example_100fish_1min	release_3	1	35	35
1413	video_example_100fish_1min	release_3	1	44	44
1414	video_example_100fish_1min	release_3	1	22	22
1415	video_example_100fish_1min	release_3	1	86	86
1416	guppy_8_t46_d1_20191207_102508	release_3	1	7	7
1417	guppy_8_t46_d1_20191207_102508	release_3	1	2	2
1418	guppy_8_t46_d1_20191207_102508	release_3	1	6	6
1419	guppy_8_t46_d1_20191207_102508	release_3	1	0	0
1420	guppy_8_t46_d1_20191207_102508	release_3	1	4	4
1421	guppy_8_t46_d1_20191207_102508	release_3	1	5	5
1422	guppy_8_t46_d1_20191207_102508	release_3	1	1	1
1423	guppy_8_t46_d1_20191207_102508	release_3	1	3	3
1424	guppy_8_t20_d1_20190512_115801	release_3	1	1	1
1425	guppy_8_t20_d1_20190512_115801	release_3	1	2	2
1426	guppy_8_t20_d1_20190512_115801	release_3	1	6	6
1427	guppy_8_t20_d1_20190512_115801	release_3	1	3	3
1428	guppy_8_t20_d1_20190512_115801	release_3	1	0	0
1429	guppy_8_t20_d1_20190512_115801	release_3	1	5	5
1430	guppy_8_t20_d1_20190512_115801	release_3	1	4	4
1431	guppy_8_t20_d1_20190512_115801	release_3	1	7	7
1432	flies_N59	release_3	1	52	52
1433	flies_N59	release_3	1	25	25
1434	flies_N59	release_3	1	13	13
1435	flies_N59	release_3	1	12	12
1436	flies_N59	release_3	1	17	17
1437	flies_N59	release_3	1	11	11
1438	flies_N59	release_3	1	15	15
1439	flies_N59	release_3	1	58	58
1440	flies_N59	release_3	1	56	56
1441	flies_N59	release_3	1	14	14
1442	flies_N59	release_3	1	33	33
1443	flies_N59	release_3	1	53	53
1444	flies_N59	release_3	1	30	30
1445	flies_N59	release_3	1	10	10
1446	flies_N59	release_3	1	9	9
1447	flies_N59	release_3	1	16	16
1448	flies_N59	release_3	1	8	8
1449	flies_N59	release_3	1	51	51
1450	flies_N59	release_3	1	7	7
1451	flies_N59	release_3	1	31	31
1452	flies_N59	release_3	1	47	47
1453	flies_N59	release_3	1	32	32
1454	flies_N59	release_3	1	26	26
1455	flies_N59	release_3	1	57	57
1456	flies_N59	release_3	1	42	42
1457	flies_N59	release_3	1	35	35
1458	flies_N59	release_3	1	27	27
1459	flies_N59	release_3	1	20	20
1460	flies_N59	release_3	1	38	38
1461	flies_N59	release_3	1	21	21
1462	flies_N59	release_3	1	46	46
1463	flies_N59	release_3	1	49	49
1464	flies_N59	release_3	1	6	6
1465	flies_N59	release_3	1	44	44
1466	flies_N59	release_3	1	24	24
1467	flies_N59	release_3	1	29	29
1468	flies_N59	release_3	1	28	28
1469	flies_N59	release_3	1	5	5
1470	flies_N59	release_3	1	34	34
1471	flies_N59	release_3	1	23	23
1472	flies_N59	release_3	1	4	4
1473	flies_N59	release_3	1	45	45
1474	flies_N59	release_3	1	39	39
1475	flies_N59	release_3	1	3	3
1476	flies_N59	release_3	1	2	2
1477	flies_N59	release_3	1	37	37
1478	flies_N59	release_3	1	55	55
1479	flies_N59	release_3	1	43	43
1480	flies_N59	release_3	1	1	1
1481	flies_N59	release_3	1	40	40
1482	flies_N59	release_3	1	22	22
1483	flies_N59	release_3	1	41	41
1484	flies_N59	release_3	1	48	48
1485	flies_N59	release_3	1	36	36
1486	flies_N59	release_3	1	19	19
1487	flies_N59	release_3	1	0	0
1488	flies_N59	release_3	1	18	18
1489	flies_N59	release_3	1	54	54
1490	flies_N59	release_3	1	50	50
1491	group_1	release_3	2	8	8
1492	group_1	release_3	2	1	1
1493	group_1	release_3	2	5	5
1494	group_1	release_3	2	3	3
1495	group_1	release_3	2	6	6
1496	group_1	release_3	2	7	7
1497	group_1	release_3	2	9	9
1498	group_1	release_3	2	2	2
1499	group_1	release_3	2	4	4
1500	group_1	release_3	2	0	0
1501	group_2	release_3	2	8	8
1502	group_2	release_3	2	4	4
1503	group_2	release_3	2	9	9
1504	group_2	release_3	2	7	7
1505	group_2	release_3	2	6	6
1506	group_2	release_3	2	1	1
1507	group_2	release_3	2	0	0
1508	group_2	release_3	2	3	3
1509	group_2	release_3	2	5	5
1510	group_2	release_3	2	2	2
1511	group_3	release_3	2	8	8
1512	group_3	release_3	2	4	4
1513	group_3	release_3	2	1	1
1514	group_3	release_3	2	9	9
1515	group_3	release_3	2	7	7
1516	group_3	release_3	2	3	3
1517	group_3	release_3	2	6	6
1518	group_3	release_3	2	0	0
1519	group_3	release_3	2	2	2
1520	group_3	release_3	2	5	5
1521	guppy_8_t36_d15_20191212_085800	release_3	2	7	7
1522	guppy_8_t36_d15_20191212_085800	release_3	2	1	1
1523	guppy_8_t36_d15_20191212_085800	release_3	2	5	5
1524	guppy_8_t36_d15_20191212_085800	release_3	2	0	0
1525	guppy_8_t36_d15_20191212_085800	release_3	2	2	2
1526	guppy_8_t36_d15_20191212_085800	release_3	2	4	4
1527	guppy_8_t36_d15_20191212_085800	release_3	2	3	3
1528	guppy_8_t36_d15_20191212_085800	release_3	2	6	6
1529	video_example_100fish_1min	release_3	2	73	73
1530	video_example_100fish_1min	release_3	2	34	34
1531	video_example_100fish_1min	release_3	2	77	77
1532	video_example_100fish_1min	release_3	2	88	88
1533	video_example_100fish_1min	release_3	2	66	66
1534	video_example_100fish_1min	release_3	2	96	96
1535	video_example_100fish_1min	release_3	2	41	41
1536	video_example_100fish_1min	release_3	2	18	18
1537	video_example_100fish_1min	release_3	2	97	97
1538	video_example_100fish_1min	release_3	2	36	36
1539	video_example_100fish_1min	release_3	2	17	17
1540	video_example_100fish_1min	release_3	2	16	16
1541	video_example_100fish_1min	release_3	2	82	82
1542	video_example_100fish_1min	release_3	2	15	15
1543	video_example_100fish_1min	release_3	2	14	14
1544	video_example_100fish_1min	release_3	2	83	83
1545	video_example_100fish_1min	release_3	2	13	13
1546	video_example_100fish_1min	release_3	2	21	21
1547	video_example_100fish_1min	release_3	2	12	12
1548	video_example_100fish_1min	release_3	2	11	11
1549	video_example_100fish_1min	release_3	2	10	10
1550	video_example_100fish_1min	release_3	2	45	45
1551	video_example_100fish_1min	release_3	2	75	75
1552	video_example_100fish_1min	release_3	2	71	71
1553	video_example_100fish_1min	release_3	2	52	52
1554	video_example_100fish_1min	release_3	2	93	93
1555	video_example_100fish_1min	release_3	2	95	95
1556	video_example_100fish_1min	release_3	2	26	26
1557	video_example_100fish_1min	release_3	2	43	43
1558	video_example_100fish_1min	release_3	2	65	65
1559	video_example_100fish_1min	release_3	2	8	8
1560	video_example_100fish_1min	release_3	2	46	46
1561	video_example_100fish_1min	release_3	2	57	57
1562	video_example_100fish_1min	release_3	2	20	20
1563	video_example_100fish_1min	release_3	2	98	98
1564	video_example_100fish_1min	release_3	2	32	32
1565	video_example_100fish_1min	release_3	2	48	48
1566	video_example_100fish_1min	release_3	2	78	78
1567	video_example_100fish_1min	release_3	2	76	76
1568	video_example_100fish_1min	release_3	2	9	9
1569	video_example_100fish_1min	release_3	2	81	81
1570	video_example_100fish_1min	release_3	2	87	87
1571	video_example_100fish_1min	release_3	2	25	25
1572	video_example_100fish_1min	release_3	2	29	29
1573	video_example_100fish_1min	release_3	2	53	53
1574	video_example_100fish_1min	release_3	2	85	85
1575	video_example_100fish_1min	release_3	2	7	7
1576	video_example_100fish_1min	release_3	2	62	62
1577	video_example_100fish_1min	release_3	2	30	30
1578	video_example_100fish_1min	release_3	2	59	59
1579	video_example_100fish_1min	release_3	2	80	80
1580	video_example_100fish_1min	release_3	2	84	84
1581	video_example_100fish_1min	release_3	2	47	47
1582	video_example_100fish_1min	release_3	2	99	99
1583	video_example_100fish_1min	release_3	2	6	6
1584	video_example_100fish_1min	release_3	2	54	54
1585	video_example_100fish_1min	release_3	2	31	31
1586	video_example_100fish_1min	release_3	2	38	38
1587	video_example_100fish_1min	release_3	2	28	28
1588	video_example_100fish_1min	release_3	2	5	5
1589	video_example_100fish_1min	release_3	2	89	89
1590	video_example_100fish_1min	release_3	2	33	33
1591	video_example_100fish_1min	release_3	2	4	4
1592	video_example_100fish_1min	release_3	2	3	3
1593	video_example_100fish_1min	release_3	2	39	39
1594	video_example_100fish_1min	release_3	2	2	2
1595	video_example_100fish_1min	release_3	2	50	50
1596	video_example_100fish_1min	release_3	2	37	37
1597	video_example_100fish_1min	release_3	2	60	60
1598	video_example_100fish_1min	release_3	2	58	58
1599	video_example_100fish_1min	release_3	2	24	24
1600	video_example_100fish_1min	release_3	2	79	79
1601	video_example_100fish_1min	release_3	2	56	56
1602	video_example_100fish_1min	release_3	2	68	68
1603	video_example_100fish_1min	release_3	2	67	67
1604	video_example_100fish_1min	release_3	2	94	94
1605	video_example_100fish_1min	release_3	2	19	19
1606	video_example_100fish_1min	release_3	2	23	23
1607	video_example_100fish_1min	release_3	2	72	72
1608	video_example_100fish_1min	release_3	2	49	49
1609	video_example_100fish_1min	release_3	2	51	51
1610	video_example_100fish_1min	release_3	2	69	69
1611	video_example_100fish_1min	release_3	2	42	42
1612	video_example_100fish_1min	release_3	2	63	63
1613	video_example_100fish_1min	release_3	2	27	27
1614	video_example_100fish_1min	release_3	2	55	55
1615	video_example_100fish_1min	release_3	2	40	40
1616	video_example_100fish_1min	release_3	2	90	90
1617	video_example_100fish_1min	release_3	2	70	70
1618	video_example_100fish_1min	release_3	2	1	1
1619	video_example_100fish_1min	release_3	2	74	74
1620	video_example_100fish_1min	release_3	2	64	64
1621	video_example_100fish_1min	release_3	2	92	92
1622	video_example_100fish_1min	release_3	2	61	61
1623	video_example_100fish_1min	release_3	2	91	91
1624	video_example_100fish_1min	release_3	2	0	0
1625	video_example_100fish_1min	release_3	2	35	35
1626	video_example_100fish_1min	release_3	2	44	44
1627	video_example_100fish_1min	release_3	2	22	22
1628	video_example_100fish_1min	release_3	2	86	86
1629	guppy_8_t46_d1_20191207_102508	release_3	2	7	7
1630	guppy_8_t46_d1_20191207_102508	release_3	2	0	0
1631	guppy_8_t46_d1_20191207_102508	release_3	2	6	6
1632	guppy_8_t46_d1_20191207_102508	release_3	2	1	1
1633	guppy_8_t46_d1_20191207_102508	release_3	2	4	4
1634	guppy_8_t46_d1_20191207_102508	release_3	2	5	5
1635	guppy_8_t46_d1_20191207_102508	release_3	2	2	2
1636	guppy_8_t46_d1_20191207_102508	release_3	2	3	3
1637	guppy_8_t20_d1_20190512_115801	release_3	2	1	1
1638	guppy_8_t20_d1_20190512_115801	release_3	2	2	2
1639	guppy_8_t20_d1_20190512_115801	release_3	2	6	6
1640	guppy_8_t20_d1_20190512_115801	release_3	2	3	3
1641	guppy_8_t20_d1_20190512_115801	release_3	2	0	0
1642	guppy_8_t20_d1_20190512_115801	release_3	2	5	5
1643	guppy_8_t20_d1_20190512_115801	release_3	2	4	4
1644	guppy_8_t20_d1_20190512_115801	release_3	2	7	7
1645	flies_N59	release_3	2	45	45
1646	flies_N59	release_3	2	22	22
1647	flies_N59	release_3	2	13	13
1648	flies_N59	release_3	2	12	12
1649	flies_N59	release_3	2	17	17
1650	flies_N59	release_3	2	11	11
1651	flies_N59	release_3	2	15	15
1652	flies_N59	release_3	2	50	50
1653	flies_N59	release_3	2	48	48
1654	flies_N59	release_3	2	14	14
1655	flies_N59	release_3	2	31	31
1656	flies_N59	release_3	2	46	46
1657	flies_N59	release_3	2	27	27
1658	flies_N59	release_3	2	10	10
1659	flies_N59	release_3	2	9	9
1660	flies_N59	release_3	2	16	16
1661	flies_N59	release_3	2	8	8
1662	flies_N59	release_3	2	44	44
1663	flies_N59	release_3	2	7	7
1664	flies_N59	release_3	2	28	28
1665	flies_N59	release_3	2	53	53
1666	flies_N59	release_3	2	29	29
1667	flies_N59	release_3	2	23	23
1668	flies_N59	release_3	2	49	49
1669	flies_N59	release_3	2	39	39
1670	flies_N59	release_3	2	33	33
1671	flies_N59	release_3	2	24	24
1672	flies_N59	release_3	2	20	20
1673	flies_N59	release_3	2	36	36
1674	flies_N59	release_3	2	21	21
1675	flies_N59	release_3	2	58	58
1676	flies_N59	release_3	2	43	43
1677	flies_N59	release_3	2	6	6
1678	flies_N59	release_3	2	40	40
1679	flies_N59	release_3	2	51	51
1680	flies_N59	release_3	2	26	26
1681	flies_N59	release_3	2	25	25
1682	flies_N59	release_3	2	5	5
1683	flies_N59	release_3	2	32	32
1684	flies_N59	release_3	2	4	4
1685	flies_N59	release_3	2	3	3
1686	flies_N59	release_3	2	41	41
1687	flies_N59	release_3	2	38	38
1688	flies_N59	release_3	2	2	2
1689	flies_N59	release_3	2	54	54
1690	flies_N59	release_3	2	35	35
1691	flies_N59	release_3	2	47	47
1692	flies_N59	release_3	2	57	57
1693	flies_N59	release_3	2	1	1
1694	flies_N59	release_3	2	37	37
1695	flies_N59	release_3	2	55	55
1696	flies_N59	release_3	2	30	30
1697	flies_N59	release_3	2	42	42
1698	flies_N59	release_3	2	34	34
1699	flies_N59	release_3	2	19	19
1700	flies_N59	release_3	2	0	0
1701	flies_N59	release_3	2	18	18
1702	flies_N59	release_3	2	52	52
1703	flies_N59	release_3	2	56	56
1704	group_1	release_3	3	8	8
1705	group_1	release_3	3	1	1
1706	group_1	release_3	3	5	5
1707	group_1	release_3	3	3	3
1708	group_1	release_3	3	6	6
1709	group_1	release_3	3	7	7
1710	group_1	release_3	3	9	9
1711	group_1	release_3	3	2	2
1712	group_1	release_3	3	4	4
1713	group_1	release_3	3	0	0
1714	group_2	release_3	3	8	8
1715	group_2	release_3	3	4	4
1716	group_2	release_3	3	9	9
1717	group_2	release_3	3	7	7
1718	group_2	release_3	3	6	6
1719	group_2	release_3	3	1	1
1720	group_2	release_3	3	0	0
1721	group_2	release_3	3	3	3
1722	group_2	release_3	3	5	5
1723	group_2	release_3	3	2	2
1724	group_3	release_3	3	8	8
1725	group_3	release_3	3	4	4
1726	group_3	release_3	3	1	1
1727	group_3	release_3	3	9	9
1728	group_3	release_3	3	7	7
1729	group_3	release_3	3	3	3
1730	group_3	release_3	3	6	6
1731	group_3	release_3	3	0	0
1732	group_3	release_3	3	2	2
1733	group_3	release_3	3	5	5
1734	guppy_8_t36_d15_20191212_085800	release_3	3	7	7
1735	guppy_8_t36_d15_20191212_085800	release_3	3	1	1
1736	guppy_8_t36_d15_20191212_085800	release_3	3	5	5
1737	guppy_8_t36_d15_20191212_085800	release_3	3	0	0
1738	guppy_8_t36_d15_20191212_085800	release_3	3	2	2
1739	guppy_8_t36_d15_20191212_085800	release_3	3	4	4
1740	guppy_8_t36_d15_20191212_085800	release_3	3	3	3
1741	guppy_8_t36_d15_20191212_085800	release_3	3	6	6
1742	video_example_100fish_1min	release_3	3	73	73
1743	video_example_100fish_1min	release_3	3	34	34
1744	video_example_100fish_1min	release_3	3	77	77
1745	video_example_100fish_1min	release_3	3	88	88
1746	video_example_100fish_1min	release_3	3	66	66
1747	video_example_100fish_1min	release_3	3	96	96
1748	video_example_100fish_1min	release_3	3	41	41
1749	video_example_100fish_1min	release_3	3	18	18
1750	video_example_100fish_1min	release_3	3	97	97
1751	video_example_100fish_1min	release_3	3	36	36
1752	video_example_100fish_1min	release_3	3	17	17
1753	video_example_100fish_1min	release_3	3	16	16
1754	video_example_100fish_1min	release_3	3	82	82
1755	video_example_100fish_1min	release_3	3	15	15
1756	video_example_100fish_1min	release_3	3	14	14
1757	video_example_100fish_1min	release_3	3	83	83
1758	video_example_100fish_1min	release_3	3	13	13
1759	video_example_100fish_1min	release_3	3	21	21
1760	video_example_100fish_1min	release_3	3	12	12
1761	video_example_100fish_1min	release_3	3	11	11
1762	video_example_100fish_1min	release_3	3	10	10
1763	video_example_100fish_1min	release_3	3	45	45
1764	video_example_100fish_1min	release_3	3	75	75
1765	video_example_100fish_1min	release_3	3	71	71
1766	video_example_100fish_1min	release_3	3	52	52
1767	video_example_100fish_1min	release_3	3	93	93
1768	video_example_100fish_1min	release_3	3	95	95
1769	video_example_100fish_1min	release_3	3	26	26
1770	video_example_100fish_1min	release_3	3	43	43
1771	video_example_100fish_1min	release_3	3	65	65
1772	video_example_100fish_1min	release_3	3	8	8
1773	video_example_100fish_1min	release_3	3	46	46
1774	video_example_100fish_1min	release_3	3	57	57
1775	video_example_100fish_1min	release_3	3	20	20
1776	video_example_100fish_1min	release_3	3	98	98
1777	video_example_100fish_1min	release_3	3	32	32
1778	video_example_100fish_1min	release_3	3	48	48
1779	video_example_100fish_1min	release_3	3	78	78
1780	video_example_100fish_1min	release_3	3	76	76
1781	video_example_100fish_1min	release_3	3	9	9
1782	video_example_100fish_1min	release_3	3	81	81
1783	video_example_100fish_1min	release_3	3	87	87
1784	video_example_100fish_1min	release_3	3	25	25
1785	video_example_100fish_1min	release_3	3	29	29
1786	video_example_100fish_1min	release_3	3	53	53
1787	video_example_100fish_1min	release_3	3	85	85
1788	video_example_100fish_1min	release_3	3	7	7
1789	video_example_100fish_1min	release_3	3	62	62
1790	video_example_100fish_1min	release_3	3	30	30
1791	video_example_100fish_1min	release_3	3	59	59
1792	video_example_100fish_1min	release_3	3	80	80
1793	video_example_100fish_1min	release_3	3	84	84
1794	video_example_100fish_1min	release_3	3	47	47
1795	video_example_100fish_1min	release_3	3	99	99
1796	video_example_100fish_1min	release_3	3	6	6
1797	video_example_100fish_1min	release_3	3	54	54
1798	video_example_100fish_1min	release_3	3	31	31
1799	video_example_100fish_1min	release_3	3	38	38
1800	video_example_100fish_1min	release_3	3	28	28
1801	video_example_100fish_1min	release_3	3	5	5
1802	video_example_100fish_1min	release_3	3	89	89
1803	video_example_100fish_1min	release_3	3	33	33
1804	video_example_100fish_1min	release_3	3	4	4
1805	video_example_100fish_1min	release_3	3	3	3
1806	video_example_100fish_1min	release_3	3	39	39
1807	video_example_100fish_1min	release_3	3	2	2
1808	video_example_100fish_1min	release_3	3	50	50
1809	video_example_100fish_1min	release_3	3	37	37
1810	video_example_100fish_1min	release_3	3	60	60
1811	video_example_100fish_1min	release_3	3	58	58
1812	video_example_100fish_1min	release_3	3	24	24
1813	video_example_100fish_1min	release_3	3	79	79
1814	video_example_100fish_1min	release_3	3	56	56
1815	video_example_100fish_1min	release_3	3	68	68
1816	video_example_100fish_1min	release_3	3	67	67
1817	video_example_100fish_1min	release_3	3	94	94
1818	video_example_100fish_1min	release_3	3	19	19
1819	video_example_100fish_1min	release_3	3	23	23
1820	video_example_100fish_1min	release_3	3	72	72
1821	video_example_100fish_1min	release_3	3	49	49
1822	video_example_100fish_1min	release_3	3	51	51
1823	video_example_100fish_1min	release_3	3	69	69
1824	video_example_100fish_1min	release_3	3	42	42
1825	video_example_100fish_1min	release_3	3	63	63
1826	video_example_100fish_1min	release_3	3	27	27
1827	video_example_100fish_1min	release_3	3	55	55
1828	video_example_100fish_1min	release_3	3	40	40
1829	video_example_100fish_1min	release_3	3	90	90
1830	video_example_100fish_1min	release_3	3	70	70
1831	video_example_100fish_1min	release_3	3	1	1
1832	video_example_100fish_1min	release_3	3	74	74
1833	video_example_100fish_1min	release_3	3	64	64
1834	video_example_100fish_1min	release_3	3	92	92
1835	video_example_100fish_1min	release_3	3	61	61
1836	video_example_100fish_1min	release_3	3	91	91
1837	video_example_100fish_1min	release_3	3	0	0
1838	video_example_100fish_1min	release_3	3	35	35
1839	video_example_100fish_1min	release_3	3	44	44
1840	video_example_100fish_1min	release_3	3	22	22
1841	video_example_100fish_1min	release_3	3	86	86
1842	guppy_8_t46_d1_20191207_102508	release_3	3	7	7
1843	guppy_8_t46_d1_20191207_102508	release_3	3	2	2
1844	guppy_8_t46_d1_20191207_102508	release_3	3	6	6
1845	guppy_8_t46_d1_20191207_102508	release_3	3	0	0
1846	guppy_8_t46_d1_20191207_102508	release_3	3	4	4
1847	guppy_8_t46_d1_20191207_102508	release_3	3	5	5
1848	guppy_8_t46_d1_20191207_102508	release_3	3	1	1
1849	guppy_8_t46_d1_20191207_102508	release_3	3	3	3
1850	guppy_8_t20_d1_20190512_115801	release_3	3	1	1
1851	guppy_8_t20_d1_20190512_115801	release_3	3	2	2
1852	guppy_8_t20_d1_20190512_115801	release_3	3	6	6
1853	guppy_8_t20_d1_20190512_115801	release_3	3	3	3
1854	guppy_8_t20_d1_20190512_115801	release_3	3	0	0
1855	guppy_8_t20_d1_20190512_115801	release_3	3	5	5
1856	guppy_8_t20_d1_20190512_115801	release_3	3	4	4
1857	guppy_8_t20_d1_20190512_115801	release_3	3	7	7
1858	flies_N59	release_3	3	43	43
1859	flies_N59	release_3	3	22	22
1860	flies_N59	release_3	3	13	13
1861	flies_N59	release_3	3	12	12
1862	flies_N59	release_3	3	17	17
1863	flies_N59	release_3	3	11	11
1864	flies_N59	release_3	3	15	15
1865	flies_N59	release_3	3	48	48
1866	flies_N59	release_3	3	46	46
1867	flies_N59	release_3	3	14	14
1868	flies_N59	release_3	3	29	29
1869	flies_N59	release_3	3	44	44
1870	flies_N59	release_3	3	58	58
1871	flies_N59	release_3	3	10	10
1872	flies_N59	release_3	3	9	9
1873	flies_N59	release_3	3	16	16
1874	flies_N59	release_3	3	8	8
1875	flies_N59	release_3	3	42	42
1876	flies_N59	release_3	3	7	7
1877	flies_N59	release_3	3	27	27
1878	flies_N59	release_3	3	51	51
1879	flies_N59	release_3	3	28	28
1880	flies_N59	release_3	3	23	23
1881	flies_N59	release_3	3	47	47
1882	flies_N59	release_3	3	38	38
1883	flies_N59	release_3	3	31	31
1884	flies_N59	release_3	3	24	24
1885	flies_N59	release_3	3	20	20
1886	flies_N59	release_3	3	34	34
1887	flies_N59	release_3	3	21	21
1888	flies_N59	release_3	3	56	56
1889	flies_N59	release_3	3	57	57
1890	flies_N59	release_3	3	6	6
1891	flies_N59	release_3	3	39	39
1892	flies_N59	release_3	3	49	49
1893	flies_N59	release_3	3	26	26
1894	flies_N59	release_3	3	25	25
1895	flies_N59	release_3	3	5	5
1896	flies_N59	release_3	3	30	30
1897	flies_N59	release_3	3	4	4
1898	flies_N59	release_3	3	3	3
1899	flies_N59	release_3	3	40	40
1900	flies_N59	release_3	3	35	35
1901	flies_N59	release_3	3	2	2
1902	flies_N59	release_3	3	52	52
1903	flies_N59	release_3	3	33	33
1904	flies_N59	release_3	3	45	45
1905	flies_N59	release_3	3	55	55
1906	flies_N59	release_3	3	1	1
1907	flies_N59	release_3	3	36	36
1908	flies_N59	release_3	3	53	53
1909	flies_N59	release_3	3	37	37
1910	flies_N59	release_3	3	41	41
1911	flies_N59	release_3	3	32	32
1912	flies_N59	release_3	3	19	19
1913	flies_N59	release_3	3	0	0
1914	flies_N59	release_3	3	18	18
1915	flies_N59	release_3	3	50	50
1916	flies_N59	release_3	3	54	54
1917	group_1	release_4	1	8	8
1918	group_1	release_4	1	1	1
1919	group_1	release_4	1	5	5
1920	group_1	release_4	1	3	3
1921	group_1	release_4	1	6	6
1922	group_1	release_4	1	7	7
1923	group_1	release_4	1	9	9
1924	group_1	release_4	1	2	2
1925	group_1	release_4	1	4	4
1926	group_1	release_4	1	0	0
1927	group_2	release_4	1	8	8
1928	group_2	release_4	1	4	4
1929	group_2	release_4	1	9	9
1930	group_2	release_4	1	7	7
1931	group_2	release_4	1	6	6
1932	group_2	release_4	1	1	1
1933	group_2	release_4	1	0	0
1934	group_2	release_4	1	3	3
1935	group_2	release_4	1	5	5
1936	group_2	release_4	1	2	2
1937	group_3	release_4	1	8	8
1938	group_3	release_4	1	4	4
1939	group_3	release_4	1	1	1
1940	group_3	release_4	1	9	9
1941	group_3	release_4	1	7	7
1942	group_3	release_4	1	3	3
1943	group_3	release_4	1	6	6
1944	group_3	release_4	1	0	0
1945	group_3	release_4	1	2	2
1946	group_3	release_4	1	5	5
1947	guppy_8_t36_d15_20191212_085800	release_4	1	7	7
1948	guppy_8_t36_d15_20191212_085800	release_4	1	1	1
1949	guppy_8_t36_d15_20191212_085800	release_4	1	5	5
1950	guppy_8_t36_d15_20191212_085800	release_4	1	0	0
1951	guppy_8_t36_d15_20191212_085800	release_4	1	2	2
1952	guppy_8_t36_d15_20191212_085800	release_4	1	4	4
1953	guppy_8_t36_d15_20191212_085800	release_4	1	3	3
1954	guppy_8_t36_d15_20191212_085800	release_4	1	6	6
1955	video_example_100fish_1min	release_4	1	73	73
1956	video_example_100fish_1min	release_4	1	34	34
1957	video_example_100fish_1min	release_4	1	77	77
1958	video_example_100fish_1min	release_4	1	88	88
1959	video_example_100fish_1min	release_4	1	66	66
1960	video_example_100fish_1min	release_4	1	97	97
1961	video_example_100fish_1min	release_4	1	41	41
1962	video_example_100fish_1min	release_4	1	18	18
1963	video_example_100fish_1min	release_4	1	96	96
1964	video_example_100fish_1min	release_4	1	36	36
1965	video_example_100fish_1min	release_4	1	17	17
1966	video_example_100fish_1min	release_4	1	16	16
1967	video_example_100fish_1min	release_4	1	82	82
1968	video_example_100fish_1min	release_4	1	15	15
1969	video_example_100fish_1min	release_4	1	14	14
1970	video_example_100fish_1min	release_4	1	83	83
1971	video_example_100fish_1min	release_4	1	13	13
1972	video_example_100fish_1min	release_4	1	21	21
1973	video_example_100fish_1min	release_4	1	12	12
1974	video_example_100fish_1min	release_4	1	11	11
1975	video_example_100fish_1min	release_4	1	10	10
1976	video_example_100fish_1min	release_4	1	45	45
1977	video_example_100fish_1min	release_4	1	75	75
1978	video_example_100fish_1min	release_4	1	71	71
1979	video_example_100fish_1min	release_4	1	52	52
1980	video_example_100fish_1min	release_4	1	93	93
1981	video_example_100fish_1min	release_4	1	95	95
1982	video_example_100fish_1min	release_4	1	26	26
1983	video_example_100fish_1min	release_4	1	43	43
1984	video_example_100fish_1min	release_4	1	65	65
1985	video_example_100fish_1min	release_4	1	8	8
1986	video_example_100fish_1min	release_4	1	46	46
1987	video_example_100fish_1min	release_4	1	57	57
1988	video_example_100fish_1min	release_4	1	20	20
1989	video_example_100fish_1min	release_4	1	98	98
1990	video_example_100fish_1min	release_4	1	32	32
1991	video_example_100fish_1min	release_4	1	48	48
1992	video_example_100fish_1min	release_4	1	78	78
1993	video_example_100fish_1min	release_4	1	76	76
1994	video_example_100fish_1min	release_4	1	9	9
1995	video_example_100fish_1min	release_4	1	81	81
1996	video_example_100fish_1min	release_4	1	87	87
1997	video_example_100fish_1min	release_4	1	25	25
1998	video_example_100fish_1min	release_4	1	29	29
[truncated: 1,196 more rows]
