# Supplementary material for: TRex, a fast multi-animal tracking system with markerless identification, and 2D estimation of posture and visual fields
Source: eLife. 2021 Feb 26;10:e64000. doi: 10.7554/eLife.64000 (PMC8096434; doi:10.7554/eLife.64000)
Supplement: Table 5—source data 1. — The total processing time (s) of each trial is indexed by video and software used – TGrabs for conversion and TRex and idtracker.ai for visual identification. This data is also used in Appendix 4—table 4. [file elife-64000-table5-data1.csv]

	trial name	video	total (s)	software
0	release_1	group_3	1211.391	TRex
1	release_2	group_3	1386.486	TRex
2	release_3	group_3	1371.327	TRex
3	release_4	group_3	1029.681	TRex
4	release_5	group_3	1429.338	TRex
5	release_1	guppy_8_t36_d15_20191212_085800	2109.742	TRex
6	release_2	guppy_8_t36_d15_20191212_085800	2156.695	TRex
7	release_3	guppy_8_t36_d15_20191212_085800	2136.242	TRex
8	release_4	guppy_8_t36_d15_20191212_085800	1202.465	TRex
9	release_5	guppy_8_t36_d15_20191212_085800	1627.097	TRex
10	release_1	N05HHS2019-10S-V1	2158.023	TRex
11	release_2	N05HHS2019-10S-V1	2247.223	TRex
12	release_3	N05HHS2019-10S-V1	2067.603	TRex
13	release_4	N05HHS2019-10S-V1	2030.114	TRex
14	release_5	N05HHS2019-10S-V1	2015.958	TRex
15	release_1	group_2	1008.395	TRex
16	release_2	group_2	1606.632	TRex
17	release_3	group_2	1555.482	TRex
18	release_4	group_2	1569.245	TRex
19	release_5	group_2	1274.246	TRex
20	release_1	guppy_8_t20_d1_20190512_115801	3139.814	TRex
21	release_2	guppy_8_t20_d1_20190512_115801	5184.183	TRex
22	release_3	guppy_8_t20_d1_20190512_115801	3626.839	TRex
23	release_4	guppy_8_t20_d1_20190512_115801	4927.467	TRex
24	release_5	guppy_8_t20_d1_20190512_115801	3779.625	TRex
25	release_1	group_1	847.353	TRex
26	release_2	group_1	751.103	TRex
27	release_3	group_1	671.173	TRex
28	release_4	group_1	818.53	TRex
29	release_5	group_1	655.093	TRex
30	release_1	N02HHS2018-8W8S-V1	0.207	TRex
31	release_2	N02HHS2018-8W8S-V1	1.232	TRex
32	release_3	N02HHS2018-8W8S-V1	0.184	TRex
33	release_4	N02HHS2018-8W8S-V1	1.223	TRex
34	release_5	N02HHS2018-8W8S-V1	0.187	TRex
35	release_1	guppy_8_t46_d1_20191207_102508	3898.294	TRex
36	release_2	guppy_8_t46_d1_20191207_102508	4052.938	TRex
37	release_3	guppy_8_t46_d1_20191207_102508	4338.058	TRex
38	release_4	guppy_8_t46_d1_20191207_102508	4500.276	TRex
39	release_5	guppy_8_t46_d1_20191207_102508	4357.021	TRex
40	release_1	15locusts1h	6228.064	TRex
41	release_2	15locusts1h	6224.537	TRex
42	release_3	15locusts1h	5976.468	TRex
43	release_4	15locusts1h	6016.612	TRex
44	release_5	15locusts1h	6008.424	TRex
45	release_1	flies_N59	5589.131	TRex
46	release_2	flies_N59	5951.134	TRex
47	release_3	flies_N59	6111.855	TRex
48	release_4	flies_N59	5392.751	TRex
49	release_5	flies_N59	5965.64	TRex
50	release_1	video_example_100fish_1min	4859.218	TRex
51	release_2	video_example_100fish_1min	4797.529	TRex
52	release_3	video_example_100fish_1min	4662.3	TRex
53	release_4	video_example_100fish_1min	3761.914	TRex
54	release_5	video_example_100fish_1min	4305.233	TRex
55	luminance	video_example_100fish_1min	124.115	TGrabs
56	luminance_2	video_example_100fish_1min	121.347	TGrabs
57	luminance_3	video_example_100fish_1min	121.072	TGrabs
58	luminance	reversals3m_128_dotbot_20190116_135201.stitched	755.845	TGrabs
59	luminance_2	reversals3m_128_dotbot_20190116_135201.stitched	715.17	TGrabs
60	luminance_3	reversals3m_128_dotbot_20190116_135201.stitched	715.797	TGrabs
61	luminance	reversals3m_512_dotbot_20190122_155201.stitched	1915.004	TGrabs
62	luminance_2	reversals3m_512_dotbot_20190122_155201.stitched	1822.909	TGrabs
63	luminance_3	reversals3m_512_dotbot_20190122_155201.stitched	1862.746	TGrabs
64	luminance	guppy_8_t36_d15_20191212_085800	1961.845	TGrabs
65	luminance_2	guppy_8_t36_d15_20191212_085800	1906.596	TGrabs
66	luminance_3	guppy_8_t36_d15_20191212_085800	1910.015	TGrabs
67	luminance	group_1	520.056	TGrabs
68	luminance_2	group_1	524.337	TGrabs
69	luminance_3	group_1	513.686	TGrabs
70	luminance	reversals3m_256_dotbot_20181214_151202.stitched	914.757	TGrabs
71	luminance_2	reversals3m_256_dotbot_20181214_151202.stitched	894.967	TGrabs
72	luminance_3	reversals3m_256_dotbot_20181214_151202.stitched	905.891	TGrabs
73	luminance	reversals3m_1024_dotbot_20181025_105202.stitched	4053.994	TGrabs
74	luminance_2	reversals3m_1024_dotbot_20181025_105202.stitched	3860.727	TGrabs
75	luminance_3	reversals3m_1024_dotbot_20181025_105202.stitched	3914.858	TGrabs
76	luminance	guppy_8_t20_d1_20190512_115801	8179.259	TGrabs
77	luminance_2	guppy_8_t20_d1_20190512_115801	7909.321	TGrabs
78	luminance_3	guppy_8_t20_d1_20190512_115801	7869.67	TGrabs
79	luminance	group_2	520.345	TGrabs
80	luminance_2	group_2	524.515	TGrabs
81	luminance_3	group_2	514.46	TGrabs
82	luminance	guppy_8_t46_d1_20191207_102508	6772.996	TGrabs
83	luminance_2	guppy_8_t46_d1_20191207_102508	6499.244	TGrabs
84	luminance_3	guppy_8_t46_d1_20191207_102508	6522.561	TGrabs
85	luminance	reversals3m_512_dotbot_20191111_165201.stitched	2068.507	TGrabs
86	luminance_2	reversals3m_512_dotbot_20191111_165201.stitched	1983.13	TGrabs
87	luminance_3	reversals3m_512_dotbot_20191111_165201.stitched	2011.234	TGrabs
88	luminance	N05HHS2019-10S-V1	270.984	TGrabs
89	luminance_2	N05HHS2019-10S-V1	262.275	TGrabs
90	luminance_3	N05HHS2019-10S-V1	264.94	TGrabs
91	luminance	15locusts1h	800.164	TGrabs
92	luminance_2	15locusts1h	784.704	TGrabs
93	luminance_3	15locusts1h	785.718	TGrabs
94	luminance	reversals3m_128_dotbot_20181211_153201.stitched	747.729	TGrabs
95	luminance_2	reversals3m_128_dotbot_20181211_153201.stitched	713.463	TGrabs
96	luminance_3	reversals3m_128_dotbot_20181211_153201.stitched	716.536	TGrabs
97	luminance	flies_N59	551.207	TGrabs
98	luminance_2	flies_N59	564.044	TGrabs
99	luminance_3	flies_N59	557.211	TGrabs
100	luminance	reversals3m_256_dotbot_20191122_154201.stitched	754.618	TGrabs
101	luminance_2	reversals3m_256_dotbot_20191122_154201.stitched	728.34	TGrabs
102	luminance_3	reversals3m_256_dotbot_20191122_154201.stitched	740.922	TGrabs
103	luminance	group_3	537.928	TGrabs
104	luminance_2	group_3	524.739	TGrabs
105	luminance_3	group_3	521.775	TGrabs
106	idtracker_1	guppy_8_t20_d1_20190512_115801	91972.606	idtracker.ai
107	idtracker_2	guppy_8_t20_d1_20190512_115801	88673.052	idtracker.ai
108	idtracker_3	guppy_8_t20_d1_20190512_115801	88244.35	idtracker.ai
109	idtracker_1	group_3	12472.979	idtracker.ai
110	idtracker_2	group_3	5532.995	idtracker.ai
111	idtracker_3	group_3	4933.004	idtracker.ai
112	idtracker_1	flies_N59	288626.44	idtracker.ai
113	idtracker_2	flies_N59	305661.979	idtracker.ai
114	idtracker_3	flies_N59	297398.914	idtracker.ai
115	idtracker_1	group_2	4615.137	idtracker.ai
116	idtracker_2	group_2	5054.436	idtracker.ai
117	idtracker_3	group_2	5142.24	idtracker.ai
118	idtracker_1	group_1	4427.765	idtracker.ai
119	idtracker_2	group_1	4776.51	idtracker.ai
120	idtracker_3	group_1	5091.609	idtracker.ai
121	idtracker_1	guppy_8_t46_d1_20191207_102508	40122.986	idtracker.ai
122	idtracker_2	guppy_8_t46_d1_20191207_102508	43948.558	idtracker.ai
123	idtracker_3	guppy_8_t46_d1_20191207_102508	43188.69	idtracker.ai
124	idtracker_1	guppy_8_t36_d15_20191212_085800	16357.928	idtracker.ai
125	idtracker_2	guppy_8_t36_d15_20191212_085800	17286.768	idtracker.ai
126	idtracker_3	guppy_8_t36_d15_20191212_085800	18810.331	idtracker.ai
127	idtracker_1	video_example_100fish_1min	27498.725	idtracker.ai
128	idtracker_2	video_example_100fish_1min	29628.023	idtracker.ai
129	idtracker_3	video_example_100fish_1min	13472.6	idtracker.ai
